# Supplementary material for: Estimating the Global Spread of Epidemic Human Monkeypox with Bayesian Directed Acyclic Graphic Model
Source: MDPI journal article supplement (doi:10.3390/vaccines11020468), 2023-02-17
Supplement: s1 [file s1]

**Supplementary:**

The data on monkeypox outbreaks are listed in the column “Observed cumulated cases” of Table S1 and Table S2. The results of predicted monkeypox cases by the Bayesian SIR model and the deterministic SIR model are listed in Table S1 and Table S2, respectively.

**Table S1 The observed cumulated monkeypox cases and predicted cumulated cases by the Bayesian SIR model**

**(a) The global monkeypox cases**

| Date      | Observed cumulated cases | Predicted cumulated cases | 95% CI |      | Date      | Observed cumulated cases | Predicted cumulated cases | 95% CI |        |
|-----------|--------------------------|---------------------------|--------|------|-----------|--------------------------|---------------------------|--------|--------|
| 2022/1/31 | 3                        | 1.0                       | -      | -    | 2022/5/8  | 37                       | 45.2                      | 32.6   | 76.4   |
| 2022/2/16 | 3                        | 7.0                       | 6.7    | 7.7  | 2022/5/9  | 37                       | 47.3                      | 34.0   | 80.3   |
| 2022/2/17 | 6                        | 7.4                       | 7.0    | 8.2  | 2022/5/10 | 37                       | 49.9                      | 35.8   | 84.8   |
| 2022/2/27 | 6                        | 11.2                      | 10.3   | 13.1 | 2022/5/11 | 37                       | 52.9                      | 37.9   | 89.9   |
| 2022/2/28 | 7                        | 11.6                      | 10.6   | 13.6 | 2022/5/12 | 38                       | 56.5                      | 40.5   | 95.8   |
| 2022/3/3  | 7                        | 12.7                      | 11.5   | 15.2 | 2022/5/13 | 39                       | 60.7                      | 43.5   | 102.6  |
| 2022/3/4  | 9                        | 13.1                      | 11.9   | 15.7 | 2022/5/14 | 39                       | 65.7                      | 47.3   | 110.3  |
| 2022/3/30 | 9                        | 23.4                      | 19.4   | 32.2 | 2022/5/15 | 43                       | 71.6                      | 51.8   | 119.2  |
| 2022/3/31 | 15                       | 23.8                      | 19.7   | 32.9 | 2022/5/16 | 43                       | 78.6                      | 57.3   | 129.5  |
| 2022/4/9  | 15                       | 27.5                      | 22.1   | 39.9 | 2022/5/17 | 46                       | 86.8                      | 63.9   | 141.2  |
| 2022/4/10 | 19                       | 27.9                      | 22.3   | 40.7 | 2022/5/18 | 67                       | 96.6                      | 71.8   | 154.7  |
| 2022/4/11 | 19                       | 28.3                      | 22.6   | 41.6 | 2022/5/19 | 86                       | 108.1                     | 81.4   | 170.1  |
| 2022/4/12 | 21                       | 28.7                      | 22.8   | 42.4 | 2022/5/20 | 131                      | 121.8                     | 93.1   | 187.9  |
| 2022/4/13 | 21                       | 29.2                      | 23.1   | 43.2 | 2022/5/21 | 147                      | 138.0                     | 107.1  | 208.3  |
| 2022/4/14 | 21                       | 29.6                      | 23.3   | 44.1 | 2022/5/22 | 147                      | 157.2                     | 124.0  | 231.7  |
| 2022/4/15 | 21                       | 30.0                      | 23.6   | 45.0 | 2022/5/23 | 220                      | 179.9                     | 144.5  | 258.6  |
| 2022/4/16 | 21                       | 30.4                      | 23.8   | 45.8 | 2022/5/24 | 256                      | 206.9                     | 169.2  | 289.4  |
| 2022/4/17 | 21                       | 30.9                      | 24.1   | 46.7 | 2022/5/25 | 300                      | 238.8                     | 199.1  | 324.9  |
| 2022/4/18 | 21                       | 31.3                      | 24.3   | 47.6 | 2022/5/26 | 388                      | 276.7                     | 235.1  | 365.5  |
| 2022/4/19 | 21                       | 31.7                      | 24.6   | 48.5 | 2022/5/27 | 440                      | 321.6                     | 278.6  | 412.2  |
| 2022/4/20 | 21                       | 32.1                      | 24.8   | 49.4 | 2022/5/28 | 457                      | 374.9                     | 331.0  | 465.8  |
| 2022/4/21 | 21                       | 32.6                      | 25.1   | 50.4 | 2022/5/29 | 477                      | 438.1                     | 395.0  | 527.8  |
| 2022/4/22 | 21                       | 33.0                      | 25.3   | 51.3 | 2022/5/30 | 600                      | 513.1                     | 471.8  | 598.2  |
| 2022/4/23 | 21                       | 33.4                      | 25.6   | 52.2 | 2022/5/31 | 665                      | 602.2                     | 564.2  | 678.8  |
| 2022/4/24 | 21                       | 33.8                      | 25.8   | 53.2 | 2022/6/1  | 749                      | 678.6                     | 641.7  | 751.9  |
| 2022/4/25 | 21                       | 34.3                      | 26.0   | 54.1 | 2022/6/2  | 874                      | 758.7                     | 722.9  | 828.5  |
| 2022/4/26 | 21                       | 34.7                      | 26.3   | 55.1 | 2022/6/3  | 968                      | 842.5                     | 808.1  | 908.9  |
| 2022/4/27 | 21                       | 35.1                      | 26.5   | 56.1 | 2022/6/4  | 976                      | 930.3                     | 897.9  | 993.8  |
| 2022/4/28 | 21                       | 35.6                      | 26.7   | 57.1 | 2022/6/5  | 1083                     | 1022.2                    | 990.9  | 1082.0 |
| 2022/4/29 | 21                       | 36.0                      | 27.0   | 58.1 | 2022/6/6  | 1198                     | 1118.5                    | 1089.3 | 1175.3 |
| 2022/4/30 | 26                       | 36.5                      | 27.2   | 59.1 | 2022/6/7  | 1348                     | 1219.3                    | 1190.6 | 1271.5 |
| 2022/5/1  | 26                       | 36.9                      | 27.4   | 60.2 | 2022/6/8  | 1445                     | 1324.8                    | 1299.9 | 1375.4 |

|          |    |      |      |      |           |      |        |        |        |
|----------|----|------|------|------|-----------|------|--------|--------|--------|
| 2022/5/2 | 26 | 37.6 | 27.8 | 61.6 | 2022/6/9  | 1591 | 1435.3 | 1411.8 | 1481.5 |
| 2022/5/3 | 26 | 38.4 | 28.3 | 63.3 | 2022/6/10 | 1634 | 1551.0 | 1528.1 | 1592.0 |
| 2022/5/4 | 26 | 39.3 | 28.9 | 65.3 | 2022/6/11 | 1643 | 1672.1 | 1650.5 | 1708.5 |
| 2022/5/5 | 26 | 40.5 | 29.5 | 67.5 | 2022/6/12 | 1757 | 1798.9 | 1778.7 | 1830.7 |
| 2022/5/6 | 27 | 41.8 | 30.4 | 70.1 | 2022/6/13 | 1817 | 1931.6 | 1912.9 | 1959.2 |
| 2022/5/7 | 27 | 43.3 | 31.4 | 73.1 | 2022/6/14 | 2061 | 2070.5 | 2053.9 | 2094.1 |

---

CI: credible interval

| Date      | Observed<br>cumulated<br>cases | Predicted<br>cumulated<br>cases | 95% CI  |         | Date      | Observed<br>cumulate<br>d cases | Predicted<br>cumulate<br>d cases | 95% CI  |         |
|-----------|--------------------------------|---------------------------------|---------|---------|-----------|---------------------------------|----------------------------------|---------|---------|
| 2022/6/15 | 2208                           | 2215.8                          | 2200.9  | 2235.1  | 2022/7/23 | 17016                           | 16773.5                          | 16664.6 | 16830.9 |
| 2022/6/16 | 2584                           | 2368.0                          | 2354.1  | 2383.6  | 2022/7/24 | 17050                           | 17550.3                          | 17447.8 | 17606.1 |
| 2022/6/17 | 2778                           | 2527.2                          | 2515.5  | 2540.4  | 2022/7/25 | 18336                           | 18357.5                          | 18261.8 | 18411.5 |
| 2022/6/18 | 2783                           | 2693.7                          | 2682.6  | 2705.0  | 2022/7/26 | 19872                           | 19196.0                          | 19109.1 | 19248.5 |
| 2022/6/19 | 2790                           | 2868.1                          | 2856.2  | 2879.1  | 2022/7/27 | 21025                           | 20066.7                          | 19987.4 | 20116.0 |
| 2022/6/20 | 3084                           | 3050.4                          | 3036.4  | 3063.2  | 2022/7/28 | 21867                           | 20970.4                          | 20900.0 | 21015.6 |
| 2022/6/21 | 3366                           | 3241.2                          | 3223.6  | 3256.3  | 2022/7/29 | 23087                           | 21908.0                          | 21849.5 | 21949.4 |
| 2022/6/22 | 3540                           | 3440.7                          | 3419.1  | 3458.6  | 2022/7/30 | 23172                           | 22880.4                          | 22833.5 | 22917.4 |
| 2022/6/23 | 4098                           | 3649.5                          | 3623.8  | 3670.2  | 2022/7/31 | 23303                           | 23784.5                          | 23746.5 | 23820.9 |
| 2022/6/24 | 4303                           | 3867.8                          | 3836.1  | 3890.2  | 2022/8/1  | 24521                           | 24688.6                          | 24655.1 | 24720.5 |
| 2022/6/25 | 4315                           | 4096.0                          | 4058.6  | 4120.3  | 2022/8/2  | 25963                           | 25592.4                          | 25563.8 | 25623.2 |
| 2022/6/26 | 4511                           | 4334.7                          | 4292.7  | 4362.1  | 2022/8/3  | 26616                           | 26495.5                          | 26467.8 | 26522.7 |
| 2022/6/27 | 4898                           | 4584.3                          | 4535.1  | 4612.2  | 2022/8/4  | 27740                           | 27397.8                          | 27370.9 | 27424.3 |
| 2022/6/28 | 5246                           | 4845.2                          | 4792.0  | 4876.7  | 2022/8/5  | 28907                           | 28298.8                          | 28270.2 | 28324.7 |
| 2022/6/29 | 5399                           | 5117.9                          | 5058.8  | 5151.2  | 2022/8/6  | 29021                           | 29198.3                          | 29167.8 | 29225.8 |
| 2022/6/30 | 6206                           | 5402.9                          | 5338.6  | 5438.7  | 2022/8/7  | 29193                           | 30096.0                          | 30065.9 | 30128.9 |
| 2022/7/1  | 6475                           | 5700.7                          | 5631.4  | 5739.0  | 2022/8/8  | 31178                           | 30991.5                          | 30956.0 | 31025.3 |
| 2022/7/2  | 6519                           | 6011.9                          | 5939.3  | 6054.4  | 2022/8/9  | 32613                           | 31884.5                          | 31848.1 | 31923.1 |
| 2022/7/3  | 6559                           | 6337.0                          | 6258.9  | 6381.3  | 2022/8/10 | 33766                           | 32774.8                          | 32735.7 | 32816.2 |
| 2022/7/4  | 7053                           | 6676.6                          | 6593.3  | 6723.0  | 2022/8/11 | 34451                           | 33662.1                          | 33622.9 | 33708.3 |
| 2022/7/5  | 7500                           | 7031.2                          | 6942.8  | 7079.2  | 2022/8/12 | 35863                           | 34546.0                          | 34504.9 | 34595.4 |
| 2022/7/6  | 7732                           | 7401.6                          | 7307.9  | 7451.2  | 2022/8/13 | 36004                           | 35426.3                          | 35380.6 | 35475.3 |
| 2022/7/7  | 8426                           | 7788.2                          | 7690.0  | 7839.7  | 2022/8/14 | 36172                           | 36302.7                          | 36256.9 | 36355.9 |
| 2022/7/8  | 9486                           | 8191.8                          | 8097.0  | 8252.5  | 2022/8/15 | 37646                           | 37175.0                          | 37127.1 | 37229.8 |
| 2022/7/9  | 9608                           | 8613.0                          | 8514.7  | 8675.6  | 2022/8/16 | 38965                           | 38042.8                          | 37994.3 | 38100.1 |
| 2022/7/10 | 9635                           | 9052.5                          | 8944.2  | 9110.2  | 2022/8/17 | 40147                           | 38906.0                          | 38859.8 | 38968.8 |
| 2022/7/11 | 10226                          | 9511.0                          | 9405.5  | 9576.2  | 2022/8/18 | 41192                           | 39764.2                          | 39717.5 | 39828.6 |
| 2022/7/12 | 11098                          | 9989.2                          | 9880.2  | 10055.3 | 2022/8/19 | 41964                           | 40617.2                          | 40570.3 | 40683.2 |
| 2022/7/13 | 11516                          | 10487.8                         | 10372.8 | 10551.0 | 2022/8/20 | 42130                           | 41464.8                          | 41417.4 | 41531.5 |
| 2022/7/14 | 12127                          | 11007.7                         | 10890.6 | 11071.4 | 2022/8/21 | 42238                           | 42306.7                          | 42259.1 | 42374.0 |
| 2022/7/15 | 13015                          | 11549.6                         | 11431.3 | 11614.5 | 2022/8/22 | 44301                           | 43142.7                          | 43091.1 | 43206.7 |
| 2022/7/16 | 13031                          | 12114.2                         | 11996.4 | 12180.8 | 2022/8/23 | 45752                           | 43972.6                          | 43920.8 | 44036.2 |
| 2022/7/17 | 13069                          | 12702.4                         | 12584.1 | 12768.7 | 2022/8/24 | 46801                           | 44796.1                          | 44744.9 | 44859.7 |
| 2022/7/18 | 13886                          | 13315.1                         | 13196.6 | 13381.0 | 2022/8/25 | 47438                           | 45613.1                          | 45562.9 | 45676.6 |
| 2022/7/19 | 15081                          | 13952.9                         | 13834.9 | 14018.1 | 2022/8/26 | 48504                           | 46423.4                          | 46377.8 | 46489.9 |
| 2022/7/20 | 15655                          | 14616.8                         | 14499.7 | 14680.4 | 2022/8/27 | 48563                           | 47226.8                          | 47176.6 | 47286.8 |
| 2022/7/21 | 16293                          | 15307.6                         | 15194.3 | 15371.5 | 2022/8/28 | 48616                           | 48023.1                          | 47979.4 | 48087.4 |
| 2022/7/22 | 17013                          | 16026.2                         | 15912.4 | 16084.7 | 2022/8/29 | 50343                           | 48812.0                          | 48768.3 | 48873.4 |

CI: credible interval

| Date      | Observed<br>cumulated<br>cases | Predicted<br>cumulated<br>cases | 95% CI  |         |
|-----------|--------------------------------|---------------------------------|---------|---------|
| 2022/8/30 | 51110                          | 49593.6                         | 49547.9 | 49649.9 |
| 2022/8/31 | 51982                          | 50367.5                         | 50322.0 | 50420.1 |
| 2022/9/1  | 52941                          | 51133.8                         | 51090.5 | 51185.1 |
| 2022/9/2  | 53629                          | 51892.1                         | 51849.2 | 51939.6 |
| 2022/9/3  | 53678                          | 52642.4                         | 52602.2 | 52688.4 |
| 2022/9/4  | 53936                          | 53384.6                         | 53345.8 | 53427.7 |
| 2022/9/5  | 54939                          | 54118.5                         | 54077.4 | 54155.9 |
| 2022/9/6  | 56138                          | 54844.1                         | 54806.8 | 54881.3 |
| 2022/9/7  | 56852                          | 55561.2                         | 55524.3 | 55595.7 |
| 2022/9/8  | 57490                          | 56269.7                         | 56235.5 | 56304.6 |
| 2022/9/9  | 58211                          | 56969.6                         | 56935.9 | 57002.6 |
| 2022/9/10 | 58322                          | 57660.9                         | 57628.6 | 57693.7 |
| 2022/9/11 | 58392                          | 58343.3                         | 58309.4 | 58374.5 |
| 2022/9/12 | 59351                          | 59017.0                         | 58983.0 | 59049.9 |
| 2022/9/13 | 60337                          | 59681.7                         | 59646.9 | 59716.3 |
| 2022/9/14 | 60784                          | 60337.5                         | 60300.3 | 60375.1 |
| 2022/9/15 | 61581                          | 60984.4                         | 60944.4 | 61025.7 |
| 2022/9/16 | 62324                          | 61622.2                         | 61578.9 | 61667.5 |
| 2022/9/17 | 62399                          | 62251.1                         | 62202.8 | 62300.0 |
| 2022/9/18 | 62403                          | 62870.9                         | 62815.3 | 62920.6 |
| 2022/9/19 | 63758                          | 63481.7                         | 63420.2 | 63534.9 |
| 2022/9/20 | 64418                          | 64083.4                         | 64021.6 | 64145.4 |
| 2022/9/21 | 64904                          | 64676.1                         | 64605.5 | 64738.6 |
| 2022/9/22 | 65215                          | 65259.8                         | 65182.8 | 65326.4 |
| 2022/9/23 | 65215                          | 65834.4                         | 65753.8 | 65907.8 |
| 2022/9/24 |                                | 66400.0                         | 66312.6 | 66477.1 |
| 2022/9/25 |                                | 66956.7                         | 66861.8 | 67037.1 |
| 2022/9/26 |                                | 67504.4                         | 67402.0 | 67588.7 |
| 2022/9/27 |                                | 68043.2                         | 67933.1 | 68131.6 |
| 2022/9/28 |                                | 68573.2                         | 68456.1 | 68666.4 |
| 2022/9/29 |                                | 69094.3                         | 68971.4 | 69193.5 |
| 2022/9/30 |                                | 69606.6                         | 69476.1 | 69710.3 |

CI: credible interval

**(b) United States**

| Date      | Observed<br>cumulated<br>cases | Predicted<br>cumulated<br>cases | 95% CI |       | Date      | Observed<br>cumulated<br>cases | Predicted<br>cumulated<br>cases | 95% CI |        |
|-----------|--------------------------------|---------------------------------|--------|-------|-----------|--------------------------------|---------------------------------|--------|--------|
| 2022/5/18 | 1                              | 1.0                             |        |       | 2022/6/25 | 243                            | 232.0                           | 225.7  | 247.3  |
| 2022/5/19 | 2                              | 1.6                             | 1.6    | 1.6   | 2022/6/26 | 252                            | 256.0                           | 248.9  | 273.4  |
| 2022/5/20 | 2                              | 2.3                             | 2.3    | 2.3   | 2022/6/27 | 315                            | 282.5                           | 274.4  | 302.1  |
| 2022/5/21 | 2                              | 3.0                             | 3.0    | 3.1   | 2022/6/28 | 359                            | 311.6                           | 302.4  | 333.9  |
| 2022/5/22 | 2                              | 3.8                             | 3.8    | 3.9   | 2022/6/29 | 409                            | 343.7                           | 333.3  | 368.9  |
| 2022/5/23 | 2                              | 4.7                             | 4.7    | 4.8   | 2022/6/30 | 470                            | 379.0                           | 367.3  | 407.6  |
| 2022/5/24 | 4                              | 5.7                             | 5.7    | 5.8   | 2022/7/1  | 543                            | 417.9                           | 404.6  | 450.2  |
| 2022/5/25 | 6                              | 6.8                             | 6.8    | 6.9   | 2022/7/2  | 547                            | 459.1                           | 444.4  | 494.7  |
| 2022/5/26 | 11                             | 8.0                             | 8.0    | 8.2   | 2022/7/3  | 553                            | 503.7                           | 487.5  | 542.4  |
| 2022/5/27 | 15                             | 9.4                             | 9.3    | 9.5   | 2022/7/4  | 563                            | 552.0                           | 534.4  | 593.8  |
| 2022/5/28 | 16                             | 10.8                            | 10.8   | 11.0  | 2022/7/5  | 709                            | 604.3                           | 585.6  | 649.4  |
| 2022/5/29 | 17                             | 12.4                            | 12.3   | 12.7  | 2022/7/6  | 749                            | 660.9                           | 640.4  | 708.5  |
| 2022/5/30 | 17                             | 14.2                            | 14.1   | 14.5  | 2022/7/7  | 883                            | 722.1                           | 700.3  | 772.5  |
| 2022/5/31 | 21                             | 16.2                            | 16.0   | 16.5  | 2022/7/8  | 950                            | 788.4                           | 765.2  | 841.2  |
| 2022/6/1  | 22                             | 18.3                            | 18.1   | 18.8  | 2022/7/9  | 960                            | 860.2                           | 835.7  | 915.2  |
| 2022/6/2  | 26                             | 20.7                            | 20.5   | 21.2  | 2022/7/10 | 964                            | 937.9                           | 912.2  | 994.9  |
| 2022/6/3  | 31                             | 23.3                            | 23.0   | 23.9  | 2022/7/11 | 1058                           | 1021.9                          | 995.0  | 1080.3 |
| 2022/6/4  | 32                             | 26.2                            | 25.9   | 26.9  | 2022/7/12 | 1122                           | 1112.9                          | 1085.2 | 1172.7 |
| 2022/6/5  | 32                             | 29.3                            | 29.0   | 30.2  | 2022/7/13 | 1245                           | 1211.3                          | 1182.7 | 1271.7 |
| 2022/6/6  | 34                             | 32.8                            | 32.4   | 33.9  | 2022/7/14 | 1426                           | 1317.8                          | 1288.4 | 1378.1 |
| 2022/6/7  | 40                             | 36.6                            | 36.2   | 37.9  | 2022/7/15 | 1767                           | 1433.1                          | 1403.1 | 1492.8 |
| 2022/6/8  | 45                             | 40.9                            | 40.3   | 42.3  | 2022/7/16 | 1767                           | 1557.7                          | 1527.4 | 1615.8 |
| 2022/6/9  | 50                             | 45.5                            | 44.9   | 47.2  | 2022/7/17 | 1767                           | 1692.6                          | 1662.2 | 1748.3 |
| 2022/6/10 | 53                             | 50.7                            | 49.9   | 52.6  | 2022/7/18 | 1995                           | 1838.6                          | 1808.4 | 1890.8 |
| 2022/6/11 | 55                             | 56.3                            | 55.4   | 58.6  | 2022/7/19 | 2114                           | 1996.4                          | 1968.9 | 2046.0 |
| 2022/6/12 | 57                             | 62.5                            | 61.5   | 65.2  | 2022/7/20 | 2323                           | 2167.2                          | 2139.6 | 2209.4 |
| 2022/6/13 | 75                             | 69.4                            | 68.1   | 72.4  | 2022/7/21 | 2503                           | 2351.8                          | 2326.8 | 2387.1 |
| 2022/6/14 | 83                             | 76.9                            | 75.5   | 80.4  | 2022/7/22 | 2875                           | 2551.5                          | 2528.9 | 2578.6 |
| 2022/6/15 | 96                             | 85.2                            | 83.6   | 89.3  | 2022/7/23 | 2875                           | 2767.4                          | 2748.0 | 2786.5 |
| 2022/6/16 | 117                            | 94.4                            | 92.5   | 99.0  | 2022/7/24 | 2875                           | 3000.8                          | 2980.0 | 3019.1 |
| 2022/6/17 | 128                            | 104.4                           | 102.3  | 109.8 | 2022/7/25 | 3457                           | 3253.0                          | 3217.8 | 3275.9 |
| 2022/6/18 | 132                            | 115.5                           | 113.0  | 121.6 | 2022/7/26 | 3768                           | 3525.7                          | 3472.5 | 3555.0 |
| 2022/6/19 | 133                            | 127.8                           | 124.9  | 134.7 | 2022/7/27 | 4630                           | 3820.3                          | 3744.1 | 3855.4 |
| 2022/6/20 | 137                            | 141.2                           | 138.0  | 149.2 | 2022/7/28 | 4895                           | 4138.7                          | 4034.9 | 4180.3 |
| 2022/6/21 | 175                            | 156.1                           | 152.3  | 165.2 | 2022/7/29 | 5175                           | 4482.5                          | 4346.4 | 4531.8 |
| 2022/6/22 | 196                            | 172.4                           | 168.1  | 182.8 | 2022/7/30 | 5175                           | 4853.8                          | 4681.1 | 4913.4 |
| 2022/6/23 | 218                            | 190.4                           | 185.5  | 202.2 | 2022/7/31 | 5175                           | 5254.7                          | 5041.7 | 5327.3 |
| 2022/6/24 | 237                            | 210.2                           | 204.7  | 223.6 | 2022/8/1  | 5792                           | 5687.5                          | 5427.4 | 5774.6 |

CI: credible interval

| Date      | Observed<br>cumulated<br>cases | Predicted<br>cumulated<br>cases | 95% CI  |         | Date      | Observed<br>cumulated<br>cases | Predicted<br>cumulated<br>cases | 95% CI  |         |
|-----------|--------------------------------|---------------------------------|---------|---------|-----------|--------------------------------|---------------------------------|---------|---------|
| 2022/8/2  | 6308                           | 6084.3                          | 5796.5  | 6180.3  | 2022/9/9  | 21761                          | 21519.0                         | 21387.3 | 21871.9 |
| 2022/8/3  | 6599                           | 6484.3                          | 6171.6  | 6585.8  | 2022/9/10 | 21761                          | 21732.8                         | 21646.8 | 21967.1 |
| 2022/8/4  | 7084                           | 6887.5                          | 6556.6  | 6995.1  | 2022/9/11 | 21761                          | 21934.8                         | 21770.5 | 22106.9 |
| 2022/8/5  | 7490                           | 7293.8                          | 6951.5  | 7407.6  | 2022/9/12 | 21834                          | 22126.1                         | 21781.5 | 22247.1 |
| 2022/8/6  | 7491                           | 7703.3                          | 7352.4  | 7818.8  | 2022/9/13 | 22480                          | 22307.2                         | 21803.6 | 22438.5 |
| 2022/8/7  | 7491                           | 8115.7                          | 7763.5  | 8233.0  | 2022/9/14 | 22619                          | 22478.7                         | 21807.6 | 22647.5 |
| 2022/8/8  | 8902                           | 8531.2                          | 8182.7  | 8648.3  | 2022/9/15 | 22958                          | 22641.4                         | 21813.0 | 22853.9 |
| 2022/8/9  | 9461                           | 8949.6                          | 8611.6  | 9066.0  | 2022/9/16 | 23339                          | 22795.6                         | 21820.2 | 23052.5 |
| 2022/8/10 | 10361                          | 9370.9                          | 9047.6  | 9483.5  | 2022/9/17 | 23339                          | 22941.9                         | 21819.0 | 23235.6 |
| 2022/8/11 | 10727                          | 9795.1                          | 9496.3  | 9905.8  | 2022/9/18 | 23339                          | 23080.8                         | 21824.4 | 23419.3 |
| 2022/8/12 | 11131                          | 10222.0                         | 9951.6  | 10327.6 | 2022/9/19 | 23730                          | 23212.6                         | 21820.6 | 23585.8 |
| 2022/8/13 | 11131                          | 10651.7                         | 10413.1 | 10747.0 | 2022/9/20 | 24041                          | 23337.7                         | 21818.7 | 23747.6 |
| 2022/8/14 | 11131                          | 11084.0                         | 10881.8 | 11168.8 | 2022/9/21 | 24198                          | 23456.5                         | 21826.9 | 23911.8 |
| 2022/8/15 | 11844                          | 11518.9                         | 11359.2 | 11593.8 | 2022/9/22 | 24403                          | 23569.4                         | 21827.3 | 24061.7 |
| 2022/8/16 | 12636                          | 11956.3                         | 11837.8 | 12018.5 | 2022/9/23 | 24403                          | 23676.6                         | 21829.3 | 24208.1 |
| 2022/8/17 | 13450                          | 12396.3                         | 12314.2 | 12445.6 | 2022/9/9  | 21761                          | 21519.0                         | 21387.3 | 21871.9 |
| 2022/8/18 | 14049                          | 12838.6                         | 12775.6 | 12896.5 | 2022/9/10 | 21761                          | 21732.8                         | 21646.8 | 21967.1 |
| 2022/8/19 | 14049                          | 13283.2                         | 13219.4 | 13402.9 | 2022/9/11 | 21761                          | 21934.8                         | 21770.5 | 22106.9 |
| 2022/8/20 | 14049                          | 13730.1                         | 13658.4 | 13933.0 | 2022/9/12 | 21834                          | 22126.1                         | 21781.5 | 22247.1 |
| 2022/8/21 | 14049                          | 14179.2                         | 14085.8 | 14471.7 | 2022/9/13 | 22480                          | 22307.2                         | 21803.6 | 22438.5 |
| 2022/8/22 | 15357                          | 14630.5                         | 14516.5 | 15020.6 | 2022/9/14 | 22619                          | 22478.7                         | 21807.6 | 22647.5 |
| 2022/8/23 | 15832                          | 15083.7                         | 14943.5 | 15577.3 | 2022/9/15 | 22958                          | 22641.4                         | 21813.0 | 22853.9 |
| 2022/8/24 | 16514                          | 15538.9                         | 15373.9 | 16146.8 | 2022/9/16 | 23339                          | 22795.6                         | 21820.2 | 23052.5 |
| 2022/8/25 | 16837                          | 15996.0                         | 15808.0 | 16730.9 | 2022/9/17 | 23339                          | 22941.9                         | 21819.0 | 23235.6 |
| 2022/8/26 | 17336                          | 16454.9                         | 16231.9 | 17312.6 | 2022/9/18 | 23339                          | 23080.8                         | 21824.4 | 23419.3 |
| 2022/8/27 | 17336                          | 16915.4                         | 16659.7 | 17910.6 | 2022/9/19 | 23730                          | 23212.6                         | 21820.6 | 23585.8 |
| 2022/8/28 | 17336                          | 17377.7                         | 17087.2 | 18519.3 | 2022/9/20 | 24041                          | 23337.7                         | 21818.7 | 23747.6 |
| 2022/8/29 | 17986                          | 17841.4                         | 17511.9 | 19133.9 | 2022/9/21 | 24198                          | 23456.5                         | 21826.9 | 23911.8 |
| 2022/8/30 | 18298                          | 18306.6                         | 17940.3 | 19762.6 | 2022/9/22 | 24403                          | 23569.4                         | 21827.3 | 24061.7 |
| 2022/8/31 | 18879                          | 18773.1                         | 18361.8 | 20394.9 | 2022/9/23 | 24403                          | 23676.6                         | 21829.3 | 24208.1 |
| 2022/9/1  | 19355                          | 19241.0                         | 18791.5 | 21046.3 | 2022/9/24 |                                | 23778.4                         | 21813.6 | 24329.9 |
| 2022/9/2  | 19852                          | 19597.6                         | 19172.1 | 21254.8 | 2022/9/25 |                                | 23875.1                         | 21813.1 | 24459.4 |
| 2022/9/3  | 19852                          | 19928.9                         | 19540.7 | 21409.1 | 2022/9/26 |                                | 23967.0                         | 21813.7 | 24584.5 |
| 2022/9/4  | 19852                          | 20237.8                         | 19888.4 | 21516.7 | 2022/9/27 |                                | 24054.4                         | 21802.1 | 24690.6 |
| 2022/9/5  | 19852                          | 20526.8                         | 20219.1 | 21596.5 | 2022/9/28 |                                | 24137.4                         | 21802.2 | 24803.2 |
| 2022/9/6  | 20608                          | 20797.9                         | 20536.7 | 21660.8 | 2022/9/29 |                                | 24216.2                         | 21800.9 | 24909.3 |
| 2022/9/7  | 21148                          | 21052.7                         | 20828.6 | 21714.2 | 2022/9/30 |                                | 24291.2                         | 21802.2 | 25012.1 |
| 2022/9/8  | 21374                          | 21292.6                         | 21113.3 | 21781.1 |           |                                |                                 |         |         |

CI: credible interval

(c) Spain

| Date      | Observed<br>cumulated<br>cases | Predicted<br>cumulated<br>cases | 95% CI  |         | Date      | Observed<br>cumulated<br>cases | Predicted<br>cumulated<br>cases | 95% CI |        |
|-----------|--------------------------------|---------------------------------|---------|---------|-----------|--------------------------------|---------------------------------|--------|--------|
| 2022/5/18 | 7                              | 7.0                             |         |         | 2022/6/25 | 736                            | 718.7                           | 708.3  | 727.9  |
| 2022/5/19 | 7                              | 10.5                            | 10.4758 | 10.5114 | 2022/6/26 | 736                            | 767.9                           | 757    | 777.6  |
| 2022/5/20 | 30                             | 14.3                            | 14.2303 | 14.3042 | 2022/6/27 | 800                            | 819.7                           | 808.6  | 830.1  |
| 2022/5/21 | 40                             | 18.3                            | 18.2872 | 18.4028 | 2022/6/28 | 800                            | 874.2                           | 862.8  | 884.9  |
| 2022/5/22 | 40                             | 22.8                            | 22.6646 | 22.8257 | 2022/6/29 | 800                            | 931.5                           | 919.7  | 942.6  |
| 2022/5/23 | 41                             | 27.5                            | 27.3974 | 27.6092 | 2022/6/30 | 1196                           | 991.7                           | 979.6  | 1003.2 |
| 2022/5/24 | 45                             | 32.6                            | 32.506  | 32.7768 | 2022/7/1  | 1196                           | 1055.1                          | 1043   | 1067.4 |
| 2022/5/25 | 53                             | 38.2                            | 38.022  | 38.3584 | 2022/7/2  | 1196                           | 1121.8                          | 1109.4 | 1134.2 |
| 2022/5/26 | 78                             | 44.2                            | 43.9787 | 44.3912 | 2022/7/3  | 1196                           | 1191.9                          | 1179.5 | 1204.7 |
| 2022/5/27 | 99                             | 50.7                            | 50.3905 | 50.8949 | 2022/7/4  | 1258                           | 1265.6                          | 1253.5 | 1279   |
| 2022/5/28 | 99                             | 57.7                            | 57.3301 | 57.9349 | 2022/7/5  | 1258                           | 1343.2                          | 1330.6 | 1356.4 |
| 2022/5/29 | 108                            | 65.2                            | 64.8154 | 65.5441 | 2022/7/6  | 1258                           | 1424.7                          | 1411.9 | 1437.7 |
| 2022/5/30 | 116                            | 73.4                            | 72.9079 | 73.7746 | 2022/7/7  | 1258                           | 1510.5                          | 1497.9 | 1523.8 |
| 2022/5/31 | 136                            | 82.2                            | 81.6215 | 82.6531 | 2022/7/8  | 2034                           | 1600.7                          | 1587.9 | 1613.9 |
| 2022/6/1  | 136                            | 91.7                            | 91.0529 | 92.2739 | 2022/7/9  | 2034                           | 1695.5                          | 1682.9 | 1708.9 |
| 2022/6/2  | 162                            | 101.9                           | 101.2   | 102.7   | 2022/7/10 | 2034                           | 1795.2                          | 1782.7 | 1808.7 |
| 2022/6/3  | 181                            | 113.0                           | 112.2   | 113.9   | 2022/7/11 | 2034                           | 1900.0                          | 1886.9 | 1912.6 |
| 2022/6/4  | 181                            | 125.0                           | 124     | 126     | 2022/7/12 | 2447                           | 2010.2                          | 1998.2 | 2023.9 |
| 2022/6/5  | 181                            | 138.0                           | 136.8   | 139.1   | 2022/7/13 | 2447                           | 2126.0                          | 2113.4 | 2139   |
| 2022/6/6  | 198                            | 151.9                           | 150.6   | 153.3   | 2022/7/14 | 2447                           | 2247.8                          | 2234.6 | 2260.7 |
| 2022/6/7  | 225                            | 167.0                           | 165.5   | 168.6   | 2022/7/15 | 2835                           | 2375.8                          | 2362.7 | 2389.5 |
| 2022/6/8  | 259                            | 183.3                           | 181.6   | 185.1   | 2022/7/16 | 2835                           | 2510.3                          | 2496.8 | 2524.5 |
| 2022/6/9  | 259                            | 200.9                           | 198.9   | 203     | 2022/7/17 | 2835                           | 2651.7                          | 2637   | 2666.4 |
| 2022/6/10 | 275                            | 219.9                           | 217.6   | 222.3   | 2022/7/18 | 2835                           | 2774.6                          | 2760.3 | 2790.9 |
| 2022/6/11 | 275                            | 240.5                           | 237.8   | 243.1   | 2022/7/19 | 3125                           | 2895.7                          | 2880.2 | 2912   |
| 2022/6/12 | 275                            | 262.6                           | 259.6   | 265.7   | 2022/7/20 | 3125                           | 3014.8                          | 2998.1 | 3030.9 |
| 2022/6/13 | 275                            | 286.6                           | 283.1   | 290.1   | 2022/7/21 | 3125                           | 3132.0                          | 3115   | 3149   |
| 2022/6/14 | 313                            | 312.4                           | 308.5   | 316.4   | 2022/7/22 | 3126                           | 3247.3                          | 3230   | 3265.3 |
| 2022/6/15 | 313                            | 340.3                           | 335.8   | 344.8   | 2022/7/23 | 3126                           | 3360.8                          | 3342.7 | 3379   |
| 2022/6/16 | 497                            | 370.5                           | 365.3   | 375.4   | 2022/7/24 | 3126                           | 3472.5                          | 3453.6 | 3490.7 |
| 2022/6/17 | 498                            | 403.0                           | 397.1   | 408.6   | 2022/7/25 | 3126                           | 3582.4                          | 3562.8 | 3600.8 |
| 2022/6/18 | 498                            | 435.9                           | 429.4   | 442     | 2022/7/26 | 3738                           | 3690.5                          | 3670.7 | 3709.1 |
| 2022/6/19 | 498                            | 470.4                           | 463.3   | 477     | 2022/7/27 | 3738                           | 3796.9                          | 3777.1 | 3816   |
| 2022/6/20 | 521                            | 506.7                           | 499.1   | 513.8   | 2022/7/28 | 3738                           | 3901.5                          | 3881.8 | 3920.9 |
| 2022/6/21 | 521                            | 544.9                           | 536.7   | 552.5   | 2022/7/29 | 4299                           | 4004.5                          | 3984.5 | 4023.9 |
| 2022/6/22 | 521                            | 585.1                           | 576.4   | 593.1   | 2022/7/30 | 4300                           | 4105.7                          | 4085.4 | 4124.9 |
| 2022/6/23 | 736                            | 627.4                           | 618.1   | 635.9   | 2022/7/31 | 4300                           | 4205.4                          | 4185.4 | 4224.8 |
| 2022/6/24 | 736                            | 671.9                           | 662     | 680.8   | 2022/8/1  | 4300                           | 4303.4                          | 4283.1 | 4322.4 |

CI: credible interval

| Date      | Observed<br>cumulated<br>cases | Predicted<br>cumulated<br>cases | 95% CI |        | Date      | Observed<br>cumulated<br>cases | Predicted<br>cumulated<br>cases | 95% CI |        |
|-----------|--------------------------------|---------------------------------|--------|--------|-----------|--------------------------------|---------------------------------|--------|--------|
| 2022/8/2  | 4577                           | 4399.7                          | 4379.8 | 4418.8 | 2022/9/9  | 6884                           | 6887.5                          | 6865.8 | 6909.5 |
| 2022/8/3  | 4577                           | 4494.6                          | 4475   | 4513.8 | 2022/9/10 | 6884                           | 6905.3                          | 6883.4 | 6927.3 |
| 2022/8/4  | 4577                           | 4587.8                          | 4568.6 | 4607.1 | 2022/9/11 | 6884                           | 6921.2                          | 6899.1 | 6944.4 |
| 2022/8/5  | 4942                           | 4679.5                          | 4660.6 | 4698.6 | 2022/9/12 | 6884                           | 6935.6                          | 6912.9 | 6960.4 |
| 2022/8/6  | 4942                           | 4769.7                          | 4751.1 | 4788.8 | 2022/9/13 | 6947                           | 6948.5                          | 6924.7 | 6975   |
| 2022/8/7  | 4942                           | 4858.4                          | 4840.5 | 4877.8 | 2022/9/14 | 6947                           | 6960.1                          | 6933.9 | 6987.3 |
| 2022/8/8  | 4942                           | 4945.7                          | 4927.7 | 4964.5 | 2022/9/15 | 6947                           | 6970.5                          | 6942.4 | 6999.2 |
| 2022/8/9  | 5162                           | 5031.4                          | 5014.3 | 5050.3 | 2022/9/16 | 7037                           | 6979.9                          | 6950.7 | 7010.9 |
| 2022/8/10 | 5162                           | 5115.8                          | 5098.7 | 5134.4 | 2022/9/17 | 7037                           | 6988.3                          | 6957.3 | 7021.3 |
| 2022/8/11 | 5162                           | 5198.8                          | 5181.5 | 5216.7 | 2022/9/18 | 7037                           | 6995.9                          | 6962.1 | 7029.8 |
| 2022/8/12 | 5719                           | 5280.3                          | 5262.7 | 5297.7 | 2022/9/19 | 7037                           | 7002.8                          | 6967.9 | 7039.4 |
| 2022/8/13 | 5719                           | 5360.5                          | 5343.6 | 5378.3 | 2022/9/20 | 7083                           | 7008.9                          | 6971.7 | 7046.6 |
| 2022/8/14 | 5719                           | 5439.4                          | 5422.2 | 5457.1 | 2022/9/21 | 7083                           | 7014.4                          | 6975.8 | 7054.1 |
| 2022/8/15 | 5719                           | 5516.9                          | 5499.8 | 5534.8 | 2022/9/22 | 7083                           | 7019.4                          | 6978.4 | 7060.1 |
| 2022/8/16 | 5792                           | 5593.2                          | 5575.4 | 5611   | 2022/9/23 | 7083                           | 7023.9                          | 6981.6 | 7066.4 |
| 2022/8/17 | 5792                           | 5668.1                          | 5650.1 | 5686.3 | 2022/9/9  | 6884                           | 7027.9                          | 6984.7 | 7072.5 |
| 2022/8/18 | 5792                           | 5741.8                          | 5723.8 | 5761   | 2022/9/10 | 6884                           | 7031.6                          | 6986.8 | 7077.7 |
| 2022/8/19 | 6119                           | 5814.2                          | 5795.7 | 5834.1 | 2022/9/11 | 6884                           | 7034.8                          | 6988.6 | 7082.3 |
| 2022/8/20 | 6119                           | 5885.4                          | 5866.1 | 5905.5 | 2022/9/12 | 6884                           | 7037.8                          | 6990.5 | 7086.9 |
| 2022/8/21 | 6119                           | 5955.4                          | 5935.3 | 5976.1 | 2022/9/13 | 6947                           | 7040.4                          | 6992   | 7091   |
| 2022/8/22 | 6119                           | 6024.3                          | 6002.3 | 6045   | 2022/9/14 | 6947                           | 7042.8                          | 6990.2 | 7091.4 |
| 2022/8/23 | 6284                           | 6091.9                          | 6071.1 | 6115.6 | 2022/9/15 | 6947                           | 7045.0                          | 6994.9 | 7098.4 |
| 2022/8/24 | 6284                           | 6158.4                          | 6134.9 | 6181.4 | 2022/9/16 | 7037                           | 6887.5                          | 6865.8 | 6909.5 |
| 2022/8/25 | 6284                           | 6223.8                          | 6199.2 | 6247.9 | 2022/9/17 | 7037                           | 6905.3                          | 6883.4 | 6927.3 |
| 2022/8/26 | 6459                           | 6288.0                          | 6262.9 | 6314   | 2022/9/18 | 7037                           | 6921.2                          | 6899.1 | 6944.4 |
| 2022/8/27 | 6459                           | 6351.2                          | 6324.7 | 6378.3 | 2022/9/19 | 7037                           | 6935.6                          | 6912.9 | 6960.4 |
| 2022/8/28 | 6459                           | 6413.2                          | 6386   | 6442.2 | 2022/9/20 | 7083                           | 6948.5                          | 6924.7 | 6975   |
| 2022/8/29 | 6459                           | 6474.2                          | 6446.3 | 6505.2 | 2022/9/21 | 7083                           | 6960.1                          | 6933.9 | 6987.3 |
| 2022/8/30 | 6543                           | 6534.2                          | 6505.3 | 6567.2 | 2022/9/22 | 7083                           | 6970.5                          | 6942.4 | 6999.2 |
| 2022/8/31 | 6543                           | 6593.1                          | 6561.9 | 6626.7 | 2022/9/23 | 7083                           | 6979.9                          | 6950.7 | 7010.9 |
| 2022/9/1  | 6543                           | 6651.0                          | 6618.8 | 6686.3 | 2022/9/24 |                                | 6988.3                          | 6957.3 | 7021.3 |
| 2022/9/2  | 6645                           | 6692.7                          | 6662.5 | 6727.2 | 2022/9/25 |                                | 6995.9                          | 6962.1 | 7029.8 |
| 2022/9/3  | 6645                           | 6730.2                          | 6699   | 6760.5 | 2022/9/26 |                                | 7002.8                          | 6967.9 | 7039.4 |
| 2022/9/4  | 6645                           | 6763.9                          | 6735.4 | 6792.6 | 2022/9/27 |                                | 7008.9                          | 6971.7 | 7046.6 |
| 2022/9/5  | 6645                           | 6794.2                          | 6765.8 | 6819   | 2022/9/28 |                                | 7014.4                          | 6975.8 | 7054.1 |
| 2022/9/6  | 6749                           | 6821.4                          | 6796.7 | 6846.1 | 2022/9/29 |                                | 7019.4                          | 6978.4 | 7060.1 |
| 2022/9/7  | 6749                           | 6845.8                          | 6822.4 | 6869.2 | 2022/9/30 |                                | 7023.9                          | 6981.6 | 7066.4 |
| 2022/9/8  | 6749                           | 6867.8                          | 6846.1 | 6890.9 |           |                                |                                 |        |        |

CI: credible interval



(d) **Brazil**

| Date      | Observed<br>cumulated<br>cases | Predicted<br>cumulated<br>cases | 95% CI |       | Date      | Observed<br>cumulated<br>cases | Predicted<br>cumulated<br>cases | 95% CI |        |
|-----------|--------------------------------|---------------------------------|--------|-------|-----------|--------------------------------|---------------------------------|--------|--------|
| 2022/6/8  | 1                              | 1.0                             |        |       | 2022/7/16 | 347                            | 355.8                           | 349.0  | 362.6  |
| 2022/6/9  | 1                              | 1.5                             | 1.5    | 1.5   | 2022/7/17 | 347                            | 388.8                           | 381.6  | 396.0  |
| 2022/6/10 | 1                              | 2.1                             | 2.1    | 2.1   | 2022/7/18 | 347                            | 424.2                           | 416.5  | 431.8  |
| 2022/6/11 | 2                              | 2.8                             | 2.8    | 2.8   | 2022/7/19 | 448                            | 462.1                           | 454.1  | 470.2  |
| 2022/6/12 | 3                              | 3.5                             | 3.5    | 3.6   | 2022/7/20 | 591                            | 502.8                           | 494.4  | 511.4  |
| 2022/6/13 | 3                              | 4.4                             | 4.4    | 4.4   | 2022/7/21 | 604                            | 546.5                           | 537.7  | 555.5  |
| 2022/6/14 | 5                              | 5.4                             | 5.3    | 5.4   | 2022/7/22 | 694                            | 593.4                           | 584.2  | 602.8  |
| 2022/6/15 | 5                              | 6.5                             | 6.4    | 6.5   | 2022/7/23 | 694                            | 643.6                           | 633.7  | 653.0  |
| 2022/6/16 | 6                              | 7.7                             | 7.7    | 7.8   | 2022/7/24 | 694                            | 697.6                           | 687.5  | 707.6  |
| 2022/6/17 | 7                              | 9.1                             | 9.0    | 9.2   | 2022/7/25 | 809                            | 755.4                           | 744.5  | 765.2  |
| 2022/6/18 | 7                              | 10.7                            | 10.6   | 10.8  | 2022/7/26 | 865                            | 817.4                           | 806.3  | 827.4  |
| 2022/6/19 | 8                              | 12.5                            | 12.4   | 12.6  | 2022/7/27 | 977                            | 884.0                           | 873.5  | 895.1  |
| 2022/6/20 | 8                              | 14.6                            | 14.4   | 14.7  | 2022/7/28 | 1066                           | 955.3                           | 945.1  | 967.0  |
| 2022/6/21 | 9                              | 16.9                            | 16.7   | 17.0  | 2022/7/29 | 1259                           | 1031.9                          | 1021.5 | 1043.7 |
| 2022/6/22 | 11                             | 19.5                            | 19.3   | 19.7  | 2022/7/30 | 1343                           | 1113.9                          | 1103.6 | 1125.9 |
| 2022/6/23 | 16                             | 22.5                            | 22.2   | 22.7  | 2022/7/31 | 1370                           | 1202.0                          | 1190.4 | 1212.7 |
| 2022/6/24 | 17                             | 25.8                            | 25.6   | 26.1  | 2022/8/1  | 1475                           | 1296.4                          | 1285.5 | 1307.6 |
| 2022/6/25 | 19                             | 29.6                            | 29.3   | 30.0  | 2022/8/2  | 1603                           | 1397.6                          | 1386.0 | 1408.4 |
| 2022/6/26 | 20                             | 34.0                            | 33.6   | 34.4  | 2022/8/3  | 1721                           | 1506.1                          | 1495.0 | 1517.7 |
| 2022/6/27 | 20                             | 38.8                            | 38.4   | 39.4  | 2022/8/4  | 1860                           | 1622.5                          | 1611.4 | 1634.2 |
| 2022/6/28 | 21                             | 44.4                            | 43.8   | 45.0  | 2022/8/5  | 2004                           | 1747.2                          | 1735.5 | 1759.0 |
| 2022/6/29 | 37                             | 50.6                            | 50.0   | 51.4  | 2022/8/6  | 2108                           | 1881.0                          | 1868.3 | 1893.1 |
| 2022/6/30 | 49                             | 57.7                            | 56.9   | 58.6  | 2022/8/7  | 2131                           | 2024.4                          | 2011.8 | 2038.2 |
| 2022/7/1  | 64                             | 65.7                            | 64.8   | 66.8  | 2022/8/8  | 2293                           | 2147.6                          | 2134.5 | 2162.1 |
| 2022/7/2  | 76                             | 74.8                            | 73.7   | 76.1  | 2022/8/9  | 2415                           | 2270.4                          | 2255.7 | 2284.6 |
| 2022/7/3  | 78                             | 85.1                            | 83.7   | 86.6  | 2022/8/10 | 2458                           | 2392.7                          | 2377.2 | 2407.5 |
| 2022/7/4  | 80                             | 96.8                            | 95.1   | 98.5  | 2022/8/11 | 2458                           | 2514.5                          | 2498.8 | 2530.5 |
| 2022/7/5  | 106                            | 110.0                           | 108.1  | 112.1 | 2022/8/12 | 2746                           | 2635.9                          | 2619.3 | 2652.2 |
| 2022/7/6  | 142                            | 124.9                           | 122.6  | 127.4 | 2022/8/13 | 2848                           | 2756.8                          | 2739.5 | 2773.6 |
| 2022/7/7  | 172                            | 141.9                           | 139.1  | 144.8 | 2022/8/14 | 2893                           | 2877.2                          | 2859.0 | 2893.9 |
| 2022/7/8  | 204                            | 161.0                           | 157.8  | 164.5 | 2022/8/15 | 2985                           | 2997.2                          | 2979.0 | 3014.9 |
| 2022/7/9  | 218                            | 179.8                           | 176.2  | 183.7 | 2022/8/16 | 3183                           | 3116.7                          | 3097.7 | 3134.5 |
| 2022/7/10 | 218                            | 200.0                           | 195.9  | 204.3 | 2022/8/17 | 3359                           | 3235.7                          | 3216.5 | 3254.0 |
| 2022/7/11 | 228                            | 221.6                           | 217.1  | 226.3 | 2022/8/18 | 3450                           | 3354.2                          | 3335.6 | 3373.6 |
| 2022/7/12 | 266                            | 244.8                           | 239.8  | 249.9 | 2022/8/19 | 3655                           | 3472.2                          | 3453.4 | 3491.8 |
| 2022/7/13 | 308                            | 269.7                           | 264.2  | 275.2 | 2022/8/20 | 3755                           | 3589.8                          | 3570.6 | 3609.3 |
| 2022/7/14 | 347                            | 296.4                           | 290.6  | 302.5 | 2022/8/21 | 3787                           | 3706.8                          | 3687.4 | 3726.4 |
| 2022/7/15 | 347                            | 325.1                           | 318.7  | 331.4 | 2022/8/22 | 3896                           | 3823.4                          | 3804.3 | 3843.3 |

| Date      | Observed<br>cumulated<br>cases | Predicted<br>cumulated<br>cases | 95% CI |        | Date      | Observed<br>cumulated<br>cases | Predicted<br>cumulated<br>cases | 95% CI |        |
|-----------|--------------------------------|---------------------------------|--------|--------|-----------|--------------------------------|---------------------------------|--------|--------|
| 2022/8/23 | 3984                           | 3939.4                          | 3919.5 | 3958.7 | 2022/9/30 |                                | 7959.5                          | 7899.1 | 8017.8 |
| 2022/8/24 | 4144                           | 4054.9                          | 4035.1 | 4074.2 |           |                                |                                 |        |        |
| 2022/8/25 | 4216                           | 4170.0                          | 4151.2 | 4190.1 |           |                                |                                 |        |        |
| 2022/8/26 | 4472                           | 4284.5                          | 4264.7 | 4303.4 |           |                                |                                 |        |        |
| 2022/8/27 | 4472                           | 4398.5                          | 4379.5 | 4417.9 |           |                                |                                 |        |        |
| 2022/8/28 | 4472                           | 4512.0                          | 4493.2 | 4531.1 |           |                                |                                 |        |        |
| 2022/8/29 | 4692                           | 4625.0                          | 4606.8 | 4644.4 |           |                                |                                 |        |        |
| 2022/8/30 | 4876                           | 4737.5                          | 4719.1 | 4756.7 |           |                                |                                 |        |        |
| 2022/8/31 | 5037                           | 4849.5                          | 4830.9 | 4868.2 |           |                                |                                 |        |        |
| 2022/9/1  | 5197                           | 4960.9                          | 4942.2 | 4979.3 |           |                                |                                 |        |        |
| 2022/9/2  | 5197                           | 5071.8                          | 5053.3 | 5090.4 |           |                                |                                 |        |        |
| 2022/9/3  | 5197                           | 5182.2                          | 5162.9 | 5200.0 |           |                                |                                 |        |        |
| 2022/9/4  | 5409                           | 5292.1                          | 5273.1 | 5310.0 |           |                                |                                 |        |        |
| 2022/9/5  | 5525                           | 5401.4                          | 5382.6 | 5419.3 |           |                                |                                 |        |        |
| 2022/9/6  | 5692                           | 5510.2                          | 5491.3 | 5528.6 |           |                                |                                 |        |        |
| 2022/9/7  | 5726                           | 5618.5                          | 5599.2 | 5637.1 |           |                                |                                 |        |        |
| 2022/9/8  | 5852                           | 5726.3                          | 5705.6 | 5744.6 |           |                                |                                 |        |        |
| 2022/9/9  | 5971                           | 5833.5                          | 5812.3 | 5852.5 |           |                                |                                 |        |        |
| 2022/9/10 | 6014                           | 5940.1                          | 5919.1 | 5960.9 |           |                                |                                 |        |        |
| 2022/9/11 | 6032                           | 6046.3                          | 6025.0 | 6068.4 |           |                                |                                 |        |        |
| 2022/9/12 | 6129                           | 6151.9                          | 6129.8 | 6175.0 |           |                                |                                 |        |        |
| 2022/9/13 | 6246                           | 6256.9                          | 6232.1 | 6279.1 |           |                                |                                 |        |        |
| 2022/9/14 | 6448                           | 6361.5                          | 6336.1 | 6385.4 |           |                                |                                 |        |        |
| 2022/9/15 | 6649                           | 6465.4                          | 6439.5 | 6491.8 |           |                                |                                 |        |        |
| 2022/9/16 | 6806                           | 6568.9                          | 6540.8 | 6596.2 |           |                                |                                 |        |        |
| 2022/9/17 | 6867                           | 6671.7                          | 6642.9 | 6701.6 |           |                                |                                 |        |        |
| 2022/9/18 | 6867                           | 6774.1                          | 6742.5 | 6804.9 |           |                                |                                 |        |        |
| 2022/9/19 | 7018                           | 6875.9                          | 6843.0 | 6908.8 |           |                                |                                 |        |        |
| 2022/9/20 | 7115                           | 6977.1                          | 6942.5 | 7012.5 |           |                                |                                 |        |        |
| 2022/9/21 | 7205                           | 7077.8                          | 7040.5 | 7114.6 |           |                                |                                 |        |        |
| 2022/9/22 | 7300                           | 7178.0                          | 7138.7 | 7217.2 |           |                                |                                 |        |        |
| 2022/9/23 | 7300                           | 7277.6                          | 7236.2 | 7318.8 |           |                                |                                 |        |        |
| 2022/9/24 |                                | 7376.7                          | 7332.5 | 7419.5 |           |                                |                                 |        |        |
| 2022/9/25 |                                | 7475.2                          | 7428.2 | 7520.2 |           |                                |                                 |        |        |
| 2022/9/26 |                                | 7573.1                          | 7523.4 | 7620.6 |           |                                |                                 |        |        |
| 2022/9/27 |                                | 7670.5                          | 7617.7 | 7719.9 |           |                                |                                 |        |        |
| 2022/9/28 |                                | 7767.4                          | 7712.1 | 7820.1 |           |                                |                                 |        |        |
| 2022/9/29 |                                | 7863.7                          | 7806.0 | 7919.2 |           |                                |                                 |        |        |

(e) United Kingdom

| Date      | Observed<br>cumulated<br>cases | Predicted<br>cumulated<br>cases | 95% CI |       | Date      | Observed<br>cumulated<br>cases | Predicted<br>cumulated<br>cases | 95% CI |        |
|-----------|--------------------------------|---------------------------------|--------|-------|-----------|--------------------------------|---------------------------------|--------|--------|
| 2022/5/6  | 1                              | 1                               |        |       | 2022/6/13 | 470                            | 446.7                           | 439.0  | 454.2  |
| 2022/5/7  | 1                              | 1.6                             | 1.6    | 1.6   | 2022/6/14 | 524                            | 478.2                           | 470.0  | 485.9  |
| 2022/5/8  | 1                              | 2.2                             | 2.2    | 2.3   | 2022/6/15 | 524                            | 510.5                           | 502.1  | 518.5  |
| 2022/5/9  | 1                              | 3.0                             | 3.0    | 3.0   | 2022/6/16 | 574                            | 543.8                           | 535.5  | 552.5  |
| 2022/5/10 | 1                              | 3.9                             | 3.9    | 3.9   | 2022/6/17 | 574                            | 578.1                           | 569.5  | 586.9  |
| 2022/5/11 | 1                              | 4.9                             | 4.8    | 4.9   | 2022/6/18 | 574                            | 613.4                           | 604.5  | 622.3  |
| 2022/5/12 | 2                              | 6.0                             | 6.0    | 6.0   | 2022/6/19 | 574                            | 649.6                           | 640.5  | 658.6  |
| 2022/5/13 | 3                              | 7.3                             | 7.3    | 7.3   | 2022/6/20 | 793                            | 687.0                           | 677.9  | 696.1  |
| 2022/5/14 | 3                              | 8.8                             | 8.7    | 8.8   | 2022/6/21 | 793                            | 725.4                           | 716.1  | 734.5  |
| 2022/5/15 | 7                              | 10.5                            | 10.4   | 10.6  | 2022/6/22 | 793                            | 764.9                           | 755.6  | 774.0  |
| 2022/5/16 | 7                              | 12.4                            | 12.4   | 12.5  | 2022/6/23 | 910                            | 805.5                           | 796.1  | 814.7  |
| 2022/5/17 | 7                              | 14.7                            | 14.6   | 14.8  | 2022/6/24 | 910                            | 847.3                           | 837.9  | 856.5  |
| 2022/5/18 | 9                              | 17.2                            | 17.1   | 17.3  | 2022/6/25 | 910                            | 890.3                           | 881.6  | 900.2  |
| 2022/5/19 | 9                              | 20.1                            | 20.0   | 20.3  | 2022/6/26 | 1076                           | 934.6                           | 925.9  | 944.4  |
| 2022/5/20 | 20                             | 23.5                            | 23.3   | 23.7  | 2022/6/27 | 1076                           | 980.1                           | 971.5  | 989.9  |
| 2022/5/21 | 20                             | 27.3                            | 27.0   | 27.5  | 2022/6/28 | 1076                           | 1027.0                          | 1018.2 | 1036.5 |
| 2022/5/22 | 20                             | 31.7                            | 31.4   | 32.0  | 2022/6/29 | 1076                           | 1075.1                          | 1066.2 | 1084.4 |
| 2022/5/23 | 57                             | 36.6                            | 36.3   | 37.0  | 2022/6/30 | 1235                           | 1124.7                          | 1116.0 | 1134.2 |
| 2022/5/24 | 71                             | 42.4                            | 41.9   | 42.8  | 2022/7/1  | 1235                           | 1175.7                          | 1166.4 | 1184.8 |
| 2022/5/25 | 78                             | 48.9                            | 48.3   | 49.5  | 2022/7/2  | 1235                           | 1228.1                          | 1218.1 | 1237.0 |
| 2022/5/26 | 106                            | 56.4                            | 55.7   | 57.1  | 2022/7/3  | 1235                           | 1282.0                          | 1272.0 | 1291.3 |
| 2022/5/27 | 106                            | 64.9                            | 64.1   | 65.7  | 2022/7/4  | 1351                           | 1337.5                          | 1327.4 | 1347.6 |
| 2022/5/28 | 106                            | 74.7                            | 73.7   | 75.7  | 2022/7/5  | 1351                           | 1394.5                          | 1384.2 | 1405.4 |
| 2022/5/29 | 106                            | 85.9                            | 84.6   | 87.1  | 2022/7/6  | 1351                           | 1446.6                          | 1435.9 | 1457.9 |
| 2022/5/30 | 179                            | 98.7                            | 97.2   | 100.1 | 2022/7/7  | 1552                           | 1497.9                          | 1486.8 | 1509.7 |
| 2022/5/31 | 190                            | 113.3                           | 111.5  | 115.0 | 2022/7/8  | 1552                           | 1548.5                          | 1537.0 | 1560.7 |
| 2022/6/1  | 196                            | 130.1                           | 127.8  | 132.1 | 2022/7/9  | 1552                           | 1598.5                          | 1586.3 | 1610.8 |
| 2022/6/2  | 207                            | 149.3                           | 146.7  | 151.7 | 2022/7/10 | 1552                           | 1647.8                          | 1635.8 | 1661.0 |
| 2022/6/3  | 226                            | 171.2                           | 168.0  | 174.1 | 2022/7/11 | 1735                           | 1696.4                          | 1683.8 | 1709.8 |
| 2022/6/4  | 226                            | 196.3                           | 192.5  | 199.8 | 2022/7/12 | 1735                           | 1744.4                          | 1731.0 | 1757.6 |
| 2022/6/5  | 226                            | 224.9                           | 220.4  | 229.1 | 2022/7/13 | 1735                           | 1791.8                          | 1778.3 | 1805.3 |
| 2022/6/6  | 302                            | 250.0                           | 245.1  | 254.7 | 2022/7/14 | 1856                           | 1838.5                          | 1824.9 | 1852.4 |
| 2022/6/7  | 321                            | 275.7                           | 270.3  | 280.8 | 2022/7/15 | 1856                           | 1884.6                          | 1870.7 | 1898.6 |
| 2022/6/8  | 321                            | 302.2                           | 296.4  | 307.8 | 2022/7/16 | 1856                           | 1930.1                          | 1916.0 | 1944.2 |
| 2022/6/9  | 366                            | 329.5                           | 323.2  | 335.5 | 2022/7/17 | 1856                           | 1975.0                          | 1960.8 | 1989.4 |
| 2022/6/10 | 366                            | 357.5                           | 350.9  | 364.0 | 2022/7/18 | 2137                           | 2019.2                          | 2005.0 | 2033.7 |
| 2022/6/11 | 366                            | 386.4                           | 379.4  | 393.2 | 2022/7/19 | 2137                           | 2062.9                          | 2048.5 | 2077.2 |
| 2022/6/12 | 470                            | 416.1                           | 408.8  | 423.3 | 2022/7/20 | 2137                           | 2106.0                          | 2091.4 | 2120.2 |

| Date      | Observed<br>cumulated cases | Predicted<br>cumulated cases | 95% CI |        | Date      | Observed<br>cumulated cases | Predicted<br>cumulated cases | 95% CI |        |
|-----------|-----------------------------|------------------------------|--------|--------|-----------|-----------------------------|------------------------------|--------|--------|
| 2022/7/21 | 2208                        | 2148.5                       | 2134.3 | 2163.2 | 2022/8/28 | 3340                        | 3397.5                       | 3366.5 | 3419.0 |
| 2022/7/22 | 2208                        | 2190.4                       | 2176.5 | 2205.4 | 2022/8/29 | 3413                        | 3422.2                       | 3392.1 | 3446.6 |
| 2022/7/23 | 2208                        | 2231.8                       | 2218.1 | 2246.8 | 2022/8/30 | 3413                        | 3446.7                       | 3414.2 | 3470.8 |
| 2022/7/24 | 2208                        | 2272.6                       | 2258.8 | 2287.3 | 2022/8/31 | 3413                        | 3470.7                       | 3437.9 | 3496.5 |
| 2022/7/25 | 2497                        | 2312.8                       | 2299.2 | 2327.7 | 2022/9/1  | 3413                        | 3494.5                       | 3460.5 | 3521.5 |
| 2022/7/26 | 2497                        | 2352.5                       | 2338.9 | 2367.2 | 2022/9/2  | 3413                        | 3504.1                       | 3472.8 | 3526.6 |
| 2022/7/27 | 2497                        | 2391.7                       | 2378.0 | 2405.9 | 2022/9/3  | 3413                        | 3511.9                       | 3485.6 | 3532.2 |
| 2022/7/28 | 2546                        | 2430.3                       | 2417.0 | 2444.7 | 2022/9/4  | 3413                        | 3518.3                       | 3496.6 | 3537.1 |
| 2022/7/29 | 2546                        | 2468.4                       | 2455.2 | 2482.6 | 2022/9/5  | 3484                        | 3523.4                       | 3504.0 | 3540.3 |
| 2022/7/30 | 2546                        | 2506.0                       | 2492.5 | 2519.5 | 2022/9/6  | 3484                        | 3527.6                       | 3509.7 | 3543.8 |
| 2022/7/31 | 2546                        | 2543.1                       | 2530.3 | 2557.1 | 2022/9/7  | 3484                        | 3531.0                       | 3514.8 | 3548.8 |
| 2022/8/1  | 2759                        | 2579.6                       | 2566.0 | 2592.5 | 2022/9/8  | 3484                        | 3533.8                       | 3516.9 | 3552.4 |
| 2022/8/2  | 2759                        | 2615.7                       | 2602.4 | 2628.6 | 2022/9/9  | 3484                        | 3536.1                       | 3518.3 | 3556.0 |
| 2022/8/3  | 2759                        | 2651.3                       | 2638.8 | 2664.9 | 2022/9/10 | 3484                        | 3538.0                       | 3518.0 | 3558.5 |
| 2022/8/4  | 2859                        | 2686.4                       | 2673.2 | 2699.2 | 2022/9/11 | 3484                        | 3539.6                       | 3519.9 | 3563.8 |
| 2022/8/5  | 2859                        | 2721.0                       | 2707.9 | 2733.6 | 2022/9/12 | 3552                        | 3540.9                       | 3516.2 | 3563.0 |
| 2022/8/6  | 2859                        | 2755.1                       | 2741.9 | 2767.6 | 2022/9/13 | 3552                        | 3542.0                       | 3517.8 | 3567.6 |
| 2022/8/7  | 2859                        | 2788.8                       | 2775.6 | 2801.5 | 2022/9/14 | 3552                        | 3542.9                       | 3517.0 | 3569.4 |
| 2022/8/8  | 3017                        | 2822.0                       | 2808.7 | 2834.7 | 2022/9/15 | 3552                        | 3543.7                       | 3517.2 | 3572.1 |
| 2022/8/9  | 3017                        | 2854.7                       | 2841.1 | 2867.3 | 2022/9/16 | 3552                        | 3544.3                       | 3516.9 | 3574.1 |
| 2022/8/10 | 3017                        | 2887.0                       | 2873.0 | 2900.0 | 2022/9/17 | 3552                        | 3544.9                       | 3517.7 | 3576.9 |
| 2022/8/11 | 3017                        | 2918.8                       | 2904.3 | 2932.1 | 2022/9/18 | 3552                        | 3545.3                       | 3517.9 | 3578.8 |
| 2022/8/12 | 3017                        | 2950.2                       | 2934.9 | 2963.6 | 2022/9/19 | 3552                        | 3545.7                       | 3517.3 | 3579.8 |
| 2022/8/13 | 3017                        | 2981.2                       | 2965.7 | 2995.2 | 2022/9/20 | 3585                        | 3546.0                       | 3518.0 | 3581.9 |
| 2022/8/14 | 3017                        | 3011.8                       | 2996.1 | 3026.4 | 2022/9/21 | 3585                        | 3546.3                       | 3518.1 | 3583.1 |
| 2022/8/15 | 3195                        | 3041.9                       | 3025.5 | 3056.9 | 2022/9/22 | 3585                        | 3546.5                       | 3518.5 | 3584.5 |
| 2022/8/16 | 3195                        | 3071.6                       | 3054.5 | 3087.1 | 2022/9/23 | 3585                        | 3546.7                       | 3518.5 | 3585.5 |
| 2022/8/17 | 3195                        | 3100.9                       | 3082.3 | 3115.9 | 2022/9/24 |                             | 3546.9                       | 3518.2 | 3586.1 |
| 2022/8/18 | 3195                        | 3129.8                       | 3111.7 | 3146.8 | 2022/9/25 |                             | 3547.1                       | 3518.2 | 3586.9 |
| 2022/8/19 | 3195                        | 3158.3                       | 3138.3 | 3174.7 | 2022/9/26 |                             | 3547.2                       | 3517.4 | 3586.7 |
| 2022/8/20 | 3195                        | 3186.4                       | 3165.9 | 3203.6 | 2022/9/27 |                             | 3547.3                       | 3517.4 | 3587.3 |
| 2022/8/21 | 3195                        | 3214.1                       | 3192.3 | 3231.8 | 2022/9/28 |                             | 3547.4                       | 3517.4 | 3587.7 |
| 2022/8/22 | 3340                        | 3241.4                       | 3217.8 | 3258.7 | 2022/9/29 |                             | 3547.5                       | 3517.4 | 3588.2 |
| 2022/8/23 | 3340                        | 3268.3                       | 3244.2 | 3286.9 | 2022/9/30 |                             | 3547.5                       | 3517.1 | 3588.2 |
| 2022/8/24 | 3340                        | 3294.9                       | 3268.7 | 3313.4 |           |                             |                              |        |        |
| 2022/8/25 | 3340                        | 3321.1                       | 3294.3 | 3340.8 |           |                             |                              |        |        |
| 2022/8/26 | 3340                        | 3346.9                       | 3318.5 | 3367.0 |           |                             |                              |        |        |
| 2022/8/27 | 3340                        | 3372.4                       | 3342.6 | 3393.1 |           |                             |                              |        |        |

**(f) Democratic Republic of the Congo**

| Date      | Observed<br>cumulated<br>cases | Predicted<br>cumulated<br>cases | 95% CI |      | Date      | Observed<br>cumulated<br>cases | Predicted<br>cumulated<br>cases | 95% CI |       |
|-----------|--------------------------------|---------------------------------|--------|------|-----------|--------------------------------|---------------------------------|--------|-------|
| 2022/5/8  | 10                             | 1.5                             | 1.5    | 1.5  | 2022/6/15 | 107                            | 92.4                            | 88.9   | 96.1  |
| 2022/5/9  | 10                             | 2.1                             | 2.0    | 2.1  | 2022/6/16 | 107                            | 94.4                            | 91.0   | 98.2  |
| 2022/5/10 | 10                             | 2.6                             | 2.6    | 2.7  | 2022/6/17 | 107                            | 96.3                            | 92.8   | 99.8  |
| 2022/5/11 | 10                             | 3.3                             | 3.2    | 3.4  | 2022/6/18 | 107                            | 98.2                            | 94.6   | 101.5 |
| 2022/5/12 | 10                             | 4.0                             | 3.9    | 4.1  | 2022/6/19 | 107                            | 99.9                            | 96.6   | 103.3 |
| 2022/5/13 | 10                             | 4.8                             | 4.7    | 4.9  | 2022/6/20 | 107                            | 101.5                           | 98.1   | 104.7 |
| 2022/5/14 | 10                             | 5.6                             | 5.5    | 5.8  | 2022/6/21 | 107                            | 103.0                           | 99.7   | 106.1 |
| 2022/5/15 | 10                             | 6.5                             | 6.4    | 6.7  | 2022/6/22 | 107                            | 104.4                           | 101.0  | 107.3 |
| 2022/5/16 | 10                             | 7.5                             | 7.3    | 7.8  | 2022/6/23 | 107                            | 105.7                           | 102.4  | 108.5 |
| 2022/5/17 | 10                             | 8.6                             | 8.4    | 8.9  | 2022/6/24 | 107                            | 106.9                           | 103.9  | 109.8 |
| 2022/5/18 | 10                             | 9.8                             | 9.5    | 10.1 | 2022/6/25 | 107                            | 108.1                           | 105.0  | 110.9 |
| 2022/5/19 | 10                             | 11.1                            | 10.8   | 11.4 | 2022/6/26 | 107                            | 109.2                           | 106.2  | 112.0 |
| 2022/5/20 | 10                             | 12.5                            | 12.2   | 12.9 | 2022/6/27 | 107                            | 110.2                           | 107.3  | 113.0 |
| 2022/5/21 | 10                             | 14.0                            | 13.6   | 14.5 | 2022/6/28 | 107                            | 111.2                           | 108.4  | 114.1 |
| 2022/5/22 | 10                             | 15.7                            | 15.2   | 16.2 | 2022/6/29 | 107                            | 112.1                           | 109.3  | 114.9 |
| 2022/5/23 | 10                             | 17.5                            | 17.0   | 18.1 | 2022/6/30 | 107                            | 113.0                           | 110.1  | 115.6 |
| 2022/5/24 | 10                             | 19.5                            | 18.9   | 20.2 | 2022/7/1  | 107                            | 113.8                           | 111.0  | 116.5 |
| 2022/5/25 | 10                             | 21.7                            | 21.0   | 22.4 | 2022/7/2  | 107                            | 114.5                           | 111.8  | 117.3 |
| 2022/5/26 | 10                             | 24.0                            | 23.2   | 24.9 | 2022/7/3  | 107                            | 115.2                           | 112.5  | 118.0 |
| 2022/5/27 | 10                             | 26.6                            | 25.7   | 27.5 | 2022/7/4  | 107                            | 115.9                           | 113.0  | 118.6 |
| 2022/5/28 | 10                             | 29.4                            | 28.3   | 30.4 | 2022/7/5  | 107                            | 116.5                           | 113.6  | 119.2 |
| 2022/5/29 | 10                             | 32.4                            | 31.1   | 33.5 | 2022/7/6  | 107                            | 117.1                           | 114.3  | 119.9 |
| 2022/5/30 | 10                             | 35.7                            | 34.2   | 37.0 | 2022/7/7  | 107                            | 117.7                           | 114.7  | 120.4 |
| 2022/5/31 | 10                             | 39.3                            | 37.6   | 40.8 | 2022/7/8  | 107                            | 118.2                           | 115.3  | 121.0 |
| 2022/6/1  | 10                             | 43.2                            | 41.3   | 45.0 | 2022/7/9  | 107                            | 118.7                           | 115.6  | 121.5 |
| 2022/6/2  | 10                             | 47.5                            | 45.3   | 49.7 | 2022/7/10 | 107                            | 119.1                           | 116.1  | 122.1 |
| 2022/6/3  | 10                             | 52.2                            | 49.6   | 54.6 | 2022/7/11 | 107                            | 119.6                           | 116.4  | 122.4 |
| 2022/6/4  | 10                             | 57.2                            | 54.3   | 60.0 | 2022/7/12 | 107                            | 120.0                           | 116.8  | 122.8 |
| 2022/6/5  | 107                            | 62.8                            | 59.5   | 66.1 | 2022/7/13 | 107                            | 120.3                           | 117.1  | 123.2 |
| 2022/6/6  | 107                            | 66.6                            | 63.3   | 70.2 | 2022/7/14 | 107                            | 120.7                           | 117.4  | 123.7 |
| 2022/6/7  | 107                            | 70.3                            | 66.8   | 74.0 | 2022/7/15 | 107                            | 121.0                           | 117.8  | 124.1 |
| 2022/6/8  | 107                            | 73.7                            | 70.1   | 77.5 | 2022/7/16 | 107                            | 121.4                           | 118.0  | 124.5 |
| 2022/6/9  | 107                            | 76.9                            | 73.2   | 80.6 | 2022/7/17 | 107                            | 121.6                           | 118.4  | 124.9 |
| 2022/6/10 | 107                            | 79.9                            | 76.2   | 83.7 | 2022/7/18 | 107                            | 121.9                           | 118.6  | 125.2 |
| 2022/6/11 | 107                            | 82.7                            | 79.0   | 86.5 | 2022/7/19 | 107                            | 122.2                           | 118.8  | 125.5 |
| 2022/6/12 | 107                            | 85.3                            | 81.7   | 89.2 | 2022/7/20 | 107                            | 122.4                           | 119.1  | 125.9 |
| 2022/6/13 | 107                            | 87.8                            | 84.2   | 91.7 | 2022/7/21 | 107                            | 122.7                           | 119.3  | 126.2 |
| 2022/6/14 | 107                            | 90.2                            | 86.6   | 94.0 | 2022/7/22 | 107                            | 122.9                           | 119.5  | 126.5 |

| Date      | Observed<br>cumulated<br>cases | Predicted<br>cumulated<br>cases | 95% CI |       | Date      | Observed<br>cumulated<br>cases | Predicted<br>cumulated<br>cases | 95% CI |       |
|-----------|--------------------------------|---------------------------------|--------|-------|-----------|--------------------------------|---------------------------------|--------|-------|
| 2022/7/23 | 107                            | 123.1                           | 119.8  | 126.9 | 2022/8/27 | 195                            | 195.4                           | 191.4  | 199.0 |
| 2022/7/24 | 107                            | 123.3                           | 120.0  | 127.1 | 2022/8/28 | 195                            | 195.4                           | 191.4  | 199.0 |
| 2022/7/25 | 107                            | 123.5                           | 120.1  | 127.3 | 2022/8/29 | 195                            | 195.4                           | 191.4  | 199.0 |
| 2022/7/26 | 107                            | 123.6                           | 120.3  | 127.6 | 2022/8/30 | 195                            | 195.4                           | 191.4  | 199.0 |
| 2022/7/27 | 107                            | 123.8                           | 120.3  | 127.7 | 2022/8/31 | 195                            | 195.4                           | 191.4  | 199.0 |
| 2022/7/28 | 163                            | 123.9                           | 120.4  | 127.9 | 2022/9/1  | 195                            | 195.4                           | 191.4  | 199.0 |
| 2022/7/29 | 163                            | 124.4                           | 120.7  | 128.4 | 2022/9/2  | 195                            | 195.4                           | 191.4  | 199.0 |
| 2022/7/30 | 163                            | 125.1                           | 121.4  | 129.3 | 2022/9/3  | 195                            | 195.4                           | 191.4  | 199.0 |
| 2022/7/31 | 163                            | 126.2                           | 122.4  | 130.7 | 2022/9/4  | 195                            | 195.4                           | 191.4  | 199.0 |
| 2022/8/1  | 163                            | 128.0                           | 124.0  | 132.6 | 2022/9/5  | 195                            | 195.4                           | 191.4  | 199.0 |
| 2022/8/2  | 163                            | 130.7                           | 126.6  | 135.7 | 2022/9/6  | 195                            | 195.4                           | 191.4  | 199.0 |
| 2022/8/3  | 163                            | 135.0                           | 130.5  | 140.2 | 2022/9/7  | 195                            | 195.4                           | 191.4  | 199.0 |
| 2022/8/4  | 163                            | 141.7                           | 136.9  | 146.9 | 2022/9/8  | 195                            | 195.4                           | 191.4  | 199.0 |
| 2022/8/5  | 163                            | 152.3                           | 147.6  | 157.2 | 2022/9/9  | 195                            | 195.4                           | 191.4  | 199.0 |
| 2022/8/6  | 163                            | 168.9                           | 164.9  | 173.1 | 2022/9/10 | 195                            | 195.4                           | 191.4  | 199.0 |
| 2022/8/7  | 195                            | 194.9                           | 190.2  | 199.1 | 2022/9/11 | 195                            | 195.4                           | 191.4  | 199.0 |
| 2022/8/8  | 195                            | 195.0                           | 190.6  | 198.9 | 2022/9/12 | 195                            | 195.4                           | 191.4  | 199.0 |
| 2022/8/9  | 195                            | 195.2                           | 191.0  | 198.9 | 2022/9/13 | 195                            | 195.4                           | 191.4  | 199.0 |
| 2022/8/10 | 195                            | 195.2                           | 191.1  | 198.9 | 2022/9/14 | 195                            | 195.4                           | 191.4  | 199.0 |
| 2022/8/11 | 195                            | 195.3                           | 191.3  | 199.0 | 2022/9/15 | 195                            | 195.4                           | 191.4  | 199.0 |
| 2022/8/12 | 195                            | 195.3                           | 191.3  | 198.9 | 2022/9/16 | 195                            | 195.4                           | 191.4  | 199.0 |
| 2022/8/13 | 195                            | 195.4                           | 191.3  | 198.9 | 2022/9/17 | 195                            | 195.4                           | 191.4  | 199.0 |
| 2022/8/14 | 195                            | 195.4                           | 191.4  | 199.0 | 2022/9/18 | 195                            | 195.4                           | 191.4  | 199.0 |
| 2022/8/15 | 195                            | 195.4                           | 191.4  | 199.0 | 2022/9/19 | 195                            | 195.4                           | 191.4  | 199.0 |
| 2022/8/16 | 195                            | 195.4                           | 191.4  | 199.0 | 2022/9/20 | 195                            | 195.4                           | 191.4  | 199.0 |
| 2022/8/17 | 195                            | 195.4                           | 191.4  | 199.0 | 2022/9/21 | 195                            | 195.4                           | 191.4  | 199.0 |
| 2022/8/18 | 195                            | 195.4                           | 191.3  | 199.0 | 2022/9/22 | 195                            | 195.4                           | 191.4  | 199.0 |
| 2022/8/19 | 195                            | 195.4                           | 191.3  | 199.0 | 2022/9/23 | 195                            | 195.4                           | 191.4  | 199.0 |
| 2022/8/20 | 195                            | 195.4                           | 191.3  | 199.0 | 2022/9/24 | 195                            | 195.4                           | 191.4  | 199.0 |
| 2022/8/21 | 195                            | 195.4                           | 191.4  | 199.0 | 2022/9/25 | 195                            | 195.4                           | 191.4  | 199.0 |
| 2022/8/22 | 195                            | 195.4                           | 191.4  | 199.0 | 2022/9/26 | 195                            | 195.4                           | 191.4  | 199.0 |
| 2022/8/23 | 195                            | 195.4                           | 191.4  | 199.0 | 2022/9/27 | 195                            | 195.4                           | 191.4  | 199.0 |
| 2022/8/24 | 195                            | 195.4                           | 191.4  | 199.0 | 2022/9/28 | 195                            | 195.4                           | 191.4  | 199.0 |
| 2022/8/25 | 195                            | 195.4                           | 191.4  | 199.0 | 2022/9/29 | 195                            | 195.4                           | 191.4  | 199.0 |
| 2022/8/26 | 195                            | 195.4                           | 191.4  | 199.0 | 2022/9/30 | 195                            | 195.4                           | 191.4  | 199.0 |

**Table S2. The observed cumulated monkeypox cases and simulated cumulated cases by the deterministic SIR model**

**(a) The global monkeypox cases**

| Date      | Observed<br>cumulated<br>cases | Simulated<br>cumulated<br>cases | Date      | Observed<br>cumulated<br>cases | Simulated<br>cumulated<br>cases |
|-----------|--------------------------------|---------------------------------|-----------|--------------------------------|---------------------------------|
| 2022/1/31 | 3                              | 1                               | 2022/5/8  | 37                             | 42                              |
| 2022/2/16 | 3                              | 3                               | 2022/5/9  | 37                             | 46                              |
| 2022/2/17 | 6                              | 4                               | 2022/5/10 | 37                             | 50                              |
| 2022/2/27 | 6                              | 5                               | 2022/5/11 | 37                             | 55                              |
| 2022/2/28 | 7                              | 6                               | 2022/5/12 | 38                             | 61                              |
| 2022/3/3  | 7                              | 6                               | 2022/5/13 | 39                             | 67                              |
| 2022/3/4  | 9                              | 7                               | 2022/5/14 | 39                             | 75                              |
| 2022/3/30 | 9                              | 13                              | 2022/5/15 | 43                             | 84                              |
| 2022/3/31 | 15                             | 14                              | 2022/5/16 | 43                             | 94                              |
| 2022/4/9  | 15                             | 17                              | 2022/5/17 | 46                             | 106                             |
| 2022/4/10 | 19                             | 17                              | 2022/5/18 | 67                             | 120                             |
| 2022/4/11 | 19                             | 18                              | 2022/5/19 | 86                             | 136                             |
| 2022/4/12 | 21                             | 18                              | 2022/5/20 | 131                            | 155                             |
| 2022/4/13 | 21                             | 19                              | 2022/5/21 | 147                            | 176                             |
| 2022/4/14 | 21                             | 19                              | 2022/5/22 | 147                            | 201                             |
| 2022/4/15 | 21                             | 19                              | 2022/5/23 | 220                            | 230                             |
| 2022/4/16 | 21                             | 20                              | 2022/5/24 | 256                            | 263                             |
| 2022/4/17 | 21                             | 20                              | 2022/5/25 | 300                            | 302                             |
| 2022/4/18 | 21                             | 21                              | 2022/5/26 | 388                            | 347                             |
| 2022/4/19 | 21                             | 21                              | 2022/5/27 | 440                            | 399                             |
| 2022/4/20 | 21                             | 22                              | 2022/5/28 | 457                            | 460                             |
| 2022/4/21 | 21                             | 22                              | 2022/5/29 | 477                            | 529                             |
| 2022/4/22 | 21                             | 22                              | 2022/5/30 | 600                            | 611                             |
| 2022/4/23 | 21                             | 23                              | 2022/5/31 | 665                            | 671                             |
| 2022/4/24 | 21                             | 23                              | 2022/6/1  | 749                            | 736                             |
| 2022/4/25 | 21                             | 24                              | 2022/6/2  | 874                            | 805                             |
| 2022/4/26 | 21                             | 24                              | 2022/6/3  | 968                            | 879                             |
| 2022/4/27 | 21                             | 25                              | 2022/6/4  | 976                            | 957                             |
| 2022/4/28 | 21                             | 25                              | 2022/6/5  | 1083                           | 1040                            |
| 2022/4/29 | 21                             | 26                              | 2022/6/6  | 1198                           | 1129                            |
| 2022/4/30 | 26                             | 26                              | 2022/6/7  | 1348                           | 1224                            |
| 2022/5/1  | 26                             | 27                              | 2022/6/8  | 1445                           | 1324                            |
| 2022/5/2  | 26                             | 29                              | 2022/6/9  | 1591                           | 1432                            |
| 2022/5/3  | 26                             | 30                              | 2022/6/10 | 1634                           | 1546                            |
| 2022/5/4  | 26                             | 32                              | 2022/6/11 | 1643                           | 1667                            |
| 2022/5/5  | 26                             | 34                              | 2022/6/12 | 1757                           | 1796                            |
| 2022/5/6  | 27                             | 36                              | 2022/6/13 | 1817                           | 1934                            |
| 2022/5/7  | 27                             | 39                              | 2022/6/14 | 2061                           | 2080                            |

| Date      | Observed<br>cumulated<br>cases | Simulated<br>cumulated<br>cases | Date      | Observed<br>cumulated<br>cases | Simulated<br>cumulated<br>cases |
|-----------|--------------------------------|---------------------------------|-----------|--------------------------------|---------------------------------|
| 2022/6/15 | 2208                           | 2235                            | 2022/7/23 | 17016                          | 17330                           |
| 2022/6/16 | 2584                           | 2401                            | 2022/7/24 | 17050                          | 18006                           |
| 2022/6/17 | 2778                           | 2578                            | 2022/7/25 | 18336                          | 18702                           |
| 2022/6/18 | 2783                           | 2765                            | 2022/7/26 | 19872                          | 19416                           |
| 2022/6/19 | 2790                           | 2965                            | 2022/7/27 | 21025                          | 20150                           |
| 2022/6/20 | 3084                           | 3177                            | 2022/7/28 | 21867                          | 20905                           |
| 2022/6/21 | 3366                           | 3403                            | 2022/7/29 | 23087                          | 21681                           |
| 2022/6/22 | 3540                           | 3643                            | 2022/7/30 | 23172                          | 22480                           |
| 2022/6/23 | 4098                           | 3899                            | 2022/7/31 | 23303                          | 23306                           |
| 2022/6/24 | 4303                           | 4172                            | 2022/8/1  | 24521                          | 24054                           |
| 2022/6/25 | 4315                           | 4460                            | 2022/8/2  | 25963                          | 24824                           |
| 2022/6/26 | 4511                           | 4768                            | 2022/8/3  | 26616                          | 25605                           |
| 2022/6/27 | 4898                           | 5096                            | 2022/8/4  | 27740                          | 26397                           |
| 2022/6/28 | 5246                           | 5444                            | 2022/8/5  | 28907                          | 27199                           |
| 2022/6/29 | 5399                           | 5813                            | 2022/8/6  | 29021                          | 28013                           |
| 2022/6/30 | 6206                           | 6208                            | 2022/8/7  | 29193                          | 28838                           |
| 2022/7/1  | 6475                           | 6545                            | 2022/8/8  | 31178                          | 29674                           |
| 2022/7/2  | 6519                           | 6895                            | 2022/8/9  | 32613                          | 30521                           |
| 2022/7/3  | 6559                           | 7258                            | 2022/8/10 | 33766                          | 31379                           |
| 2022/7/4  | 7053                           | 7631                            | 2022/8/11 | 34451                          | 32248                           |
| 2022/7/5  | 7500                           | 8017                            | 2022/8/12 | 35863                          | 33128                           |
| 2022/7/6  | 7732                           | 8413                            | 2022/8/13 | 36004                          | 34020                           |
| 2022/7/7  | 8426                           | 8821                            | 2022/8/14 | 36172                          | 34923                           |
| 2022/7/8  | 9486                           | 9243                            | 2022/8/15 | 37646                          | 35838                           |
| 2022/7/9  | 9608                           | 9678                            | 2022/8/16 | 38965                          | 36763                           |
| 2022/7/10 | 9635                           | 10126                           | 2022/8/17 | 40147                          | 37700                           |
| 2022/7/11 | 10226                          | 10588                           | 2022/8/18 | 41192                          | 38647                           |
| 2022/7/12 | 11098                          | 11064                           | 2022/8/19 | 41964                          | 39606                           |
| 2022/7/13 | 11516                          | 11552                           | 2022/8/20 | 42130                          | 40577                           |
| 2022/7/14 | 12127                          | 12056                           | 2022/8/21 | 42238                          | 41558                           |
| 2022/7/15 | 13015                          | 12576                           | 2022/8/22 | 44301                          | 42551                           |
| 2022/7/16 | 13031                          | 13112                           | 2022/8/23 | 45752                          | 43554                           |
| 2022/7/17 | 13069                          | 13664                           | 2022/8/24 | 46801                          | 44569                           |
| 2022/7/18 | 13886                          | 14232                           | 2022/8/25 | 47438                          | 45595                           |
| 2022/7/19 | 15081                          | 14816                           | 2022/8/26 | 48504                          | 46633                           |
| 2022/7/20 | 15655                          | 15416                           | 2022/8/27 | 48563                          | 47681                           |
| 2022/7/21 | 16293                          | 16035                           | 2022/8/28 | 48616                          | 48740                           |
| 2022/7/22 | 17013                          | 16673                           | 2022/8/29 | 50343                          | 49810                           |



| Date      | Observed<br>cumulated<br>cases | Simulated<br>cumulated<br>cases | Date | Observed<br>cumulated<br>cases | Simulated<br>cumulated<br>cases |
|-----------|--------------------------------|---------------------------------|------|--------------------------------|---------------------------------|
| 2022/8/30 | 51110                          | 50891                           |      |                                |                                 |
| 2022/8/31 | 51982                          | 51988                           |      |                                |                                 |
| 2022/9/1  | 52941                          | 52744                           |      |                                |                                 |
| 2022/9/2  | 53629                          | 53490                           |      |                                |                                 |
| 2022/9/3  | 53678                          | 54216                           |      |                                |                                 |
| 2022/9/4  | 53936                          | 54920                           |      |                                |                                 |
| 2022/9/5  | 54939                          | 55606                           |      |                                |                                 |
| 2022/9/6  | 56138                          | 56274                           |      |                                |                                 |
| 2022/9/7  | 56852                          | 56925                           |      |                                |                                 |
| 2022/9/8  | 57490                          | 57560                           |      |                                |                                 |
| 2022/9/9  | 58211                          | 58177                           |      |                                |                                 |
| 2022/9/10 | 58322                          | 58778                           |      |                                |                                 |
| 2022/9/11 | 58392                          | 59362                           |      |                                |                                 |
| 2022/9/12 | 59351                          | 59928                           |      |                                |                                 |
| 2022/9/13 | 60337                          | 60477                           |      |                                |                                 |
| 2022/9/14 | 60784                          | 61011                           |      |                                |                                 |
| 2022/9/15 | 61581                          | 61531                           |      |                                |                                 |
| 2022/9/16 | 62324                          | 62038                           |      |                                |                                 |
| 2022/9/17 | 62399                          | 62531                           |      |                                |                                 |
| 2022/9/18 | 62403                          | 63012                           |      |                                |                                 |
| 2022/9/19 | 63758                          | 63479                           |      |                                |                                 |
| 2022/9/20 | 64418                          | 63933                           |      |                                |                                 |
| 2022/9/21 | 64904                          | 64373                           |      |                                |                                 |
| 2022/9/22 | 65215                          | 64800                           |      |                                |                                 |
| 2022/9/23 | 65215                          | 65214                           |      |                                |                                 |

**(b) United States**

| Date      | Observed<br>cumulated<br>cases | Simulated<br>cumulated<br>cases | Date      | Observed<br>cumulated<br>cases | Simulated<br>cumulated<br>cases |
|-----------|--------------------------------|---------------------------------|-----------|--------------------------------|---------------------------------|
| 2022/5/18 | 1                              | 1.0                             | 2022/6/25 | 243                            | 247.7                           |
| 2022/5/19 | 2                              | 1.3                             | 2022/6/26 | 252                            | 281.6                           |
| 2022/5/20 | 2                              | 1.6                             | 2022/6/27 | 315                            | 320.2                           |
| 2022/5/21 | 2                              | 1.9                             | 2022/6/28 | 359                            | 364.0                           |
| 2022/5/22 | 2                              | 2.3                             | 2022/6/29 | 409                            | 413.8                           |
| 2022/5/23 | 2                              | 2.7                             | 2022/6/30 | 470                            | 470.5                           |
| 2022/5/24 | 4                              | 3.2                             | 2022/7/1  | 543                            | 517.0                           |
| 2022/5/25 | 6                              | 3.8                             | 2022/7/2  | 547                            | 567.0                           |
| 2022/5/26 | 11                             | 4.4                             | 2022/7/3  | 553                            | 620.0                           |
| 2022/5/27 | 15                             | 5.2                             | 2022/7/4  | 563                            | 677.0                           |
| 2022/5/28 | 16                             | 6.0                             | 2022/7/5  | 709                            | 739.0                           |
| 2022/5/29 | 17                             | 6.9                             | 2022/7/6  | 749                            | 804.0                           |
| 2022/5/30 | 17                             | 8.0                             | 2022/7/7  | 883                            | 874.0                           |
| 2022/5/31 | 21                             | 9.2                             | 2022/7/8  | 950                            | 949.0                           |
| 2022/6/1  | 22                             | 10.6                            | 2022/7/9  | 960                            | 1028.0                          |
| 2022/6/2  | 26                             | 12.2                            | 2022/7/10 | 964                            | 1114.0                          |
| 2022/6/3  | 31                             | 14.0                            | 2022/7/11 | 1058                           | 1205.0                          |
| 2022/6/4  | 32                             | 16.0                            | 2022/7/12 | 1122                           | 1303.0                          |
| 2022/6/5  | 32                             | 18.3                            | 2022/7/13 | 1245                           | 1407.0                          |
| 2022/6/6  | 34                             | 20.9                            | 2022/7/14 | 1426                           | 1519.0                          |
| 2022/6/7  | 40                             | 23.9                            | 2022/7/15 | 1767                           | 1638.0                          |
| 2022/6/8  | 45                             | 27.3                            | 2022/7/16 | 1767                           | 1766.0                          |
| 2022/6/9  | 50                             | 31.1                            | 2022/7/17 | 1767                           | 1903.0                          |
| 2022/6/10 | 53                             | 35.5                            | 2022/7/18 | 1995                           | 2049.0                          |
| 2022/6/11 | 55                             | 40.5                            | 2022/7/19 | 2114                           | 2204.0                          |
| 2022/6/12 | 57                             | 46.1                            | 2022/7/20 | 2323                           | 2371.0                          |
| 2022/6/13 | 75                             | 52.6                            | 2022/7/21 | 2503                           | 2550.0                          |
| 2022/6/14 | 83                             | 59.9                            | 2022/7/22 | 2875                           | 2740.0                          |
| 2022/6/15 | 96                             | 68.2                            | 2022/7/23 | 2875                           | 2944.0                          |
| 2022/6/16 | 117                            | 77.6                            | 2022/7/24 | 2875                           | 3163.0                          |
| 2022/6/17 | 128                            | 88.3                            | 2022/7/25 | 3457                           | 3396.0                          |
| 2022/6/18 | 132                            | 100.5                           | 2022/7/26 | 3768                           | 3645.0                          |
| 2022/6/19 | 133                            | 114.4                           | 2022/7/27 | 4630                           | 3912.0                          |
| 2022/6/20 | 137                            | 130.1                           | 2022/7/28 | 4895                           | 4197.0                          |
| 2022/6/21 | 175                            | 148.0                           | 2022/7/29 | 5175                           | 4501.0                          |
| 2022/6/22 | 196                            | 168.4                           | 2022/7/30 | 5175                           | 4826.0                          |
| 2022/6/23 | 218                            | 191.5                           | 2022/7/31 | 5175                           | 5174.0                          |
| 2022/6/24 | 237                            | 217.8                           | 2022/8/1  | 5792                           | 5466.0                          |

| Date      | Observed<br>cumulated<br>cases | Simulated<br>cumulated<br>cases | Date      | Observed<br>cumulated<br>cases | Simulated<br>cumulated<br>cases |
|-----------|--------------------------------|---------------------------------|-----------|--------------------------------|---------------------------------|
| 2022/8/2  | 6308                           | 5760.0                          | 2022/9/9  | 21761                          | 21626.0                         |
| 2022/8/3  | 6599                           | 6062.0                          | 2022/9/10 | 21761                          | 21876.0                         |
| 2022/8/4  | 7084                           | 6372.0                          | 2022/9/11 | 21761                          | 22118.0                         |
| 2022/8/5  | 7490                           | 6691.0                          | 2022/9/12 | 21834                          | 22351.0                         |
| 2022/8/6  | 7491                           | 7018.0                          | 2022/9/13 | 22480                          | 22575.0                         |
| 2022/8/7  | 7491                           | 7355.0                          | 2022/9/14 | 22619                          | 22791.0                         |
| 2022/8/8  | 8902                           | 7702.0                          | 2022/9/15 | 22958                          | 22999.0                         |
| 2022/8/9  | 9461                           | 8058.0                          | 2022/9/16 | 23339                          | 23198.0                         |
| 2022/8/10 | 10361                          | 8423.0                          | 2022/9/17 | 23339                          | 23390.0                         |
| 2022/8/11 | 10727                          | 8798.0                          | 2022/9/18 | 23339                          | 23575.0                         |
| 2022/8/12 | 11131                          | 9183.0                          | 2022/9/19 | 23730                          | 23754.0                         |
| 2022/8/13 | 11131                          | 9578.0                          | 2022/9/20 | 24041                          | 23926.0                         |
| 2022/8/14 | 11131                          | 9985.0                          | 2022/9/21 | 24198                          | 24091.0                         |
| 2022/8/15 | 11844                          | 10404.0                         | 2022/9/22 | 24403                          | 24250.0                         |
| 2022/8/16 | 12636                          | 10834.0                         | 2022/9/23 | 24403                          | 24402.0                         |
| 2022/8/17 | 13450                          | 11276.0                         | 2022/9/9  | 21761                          | 21626.0                         |
| 2022/8/18 | 14049                          | 11729.0                         | 2022/9/10 | 21761                          | 21876.0                         |
| 2022/8/19 | 14049                          | 12193.0                         | 2022/9/11 | 21761                          | 22118.0                         |
| 2022/8/20 | 14049                          | 12670.0                         | 2022/9/12 | 21834                          | 22351.0                         |
| 2022/8/21 | 14049                          | 13162.0                         | 2022/9/13 | 22480                          | 22575.0                         |
| 2022/8/22 | 15357                          | 13668.0                         | 2022/9/14 | 22619                          | 22791.0                         |
| 2022/8/23 | 15832                          | 14187.0                         | 2022/9/15 | 22958                          | 22999.0                         |
| 2022/8/24 | 16514                          | 14721.0                         | 2022/9/16 | 23339                          | 23198.0                         |
| 2022/8/25 | 16837                          | 15268.0                         | 2022/9/17 | 23339                          | 23390.0                         |
| 2022/8/26 | 17336                          | 15830.0                         | 2022/9/18 | 23339                          | 23575.0                         |
| 2022/8/27 | 17336                          | 16407.0                         | 2022/9/19 | 23730                          | 23754.0                         |
| 2022/8/28 | 17336                          | 16999.0                         | 2022/9/20 | 24041                          | 23926.0                         |
| 2022/8/29 | 17986                          | 17608.0                         | 2022/9/21 | 24198                          | 24091.0                         |
| 2022/8/30 | 18298                          | 18233.0                         | 2022/9/22 | 24403                          | 24250.0                         |
| 2022/8/31 | 18879                          | 18876.0                         | 2022/9/23 | 24403                          | 24402.0                         |
| 2022/9/1  | 19355                          | 19236.0                         |           |                                |                                 |
| 2022/9/2  | 19852                          | 19575.0                         |           |                                |                                 |
| 2022/9/3  | 19852                          | 19902.0                         |           |                                |                                 |
| 2022/9/4  | 19852                          | 20216.0                         |           |                                |                                 |
| 2022/9/5  | 19852                          | 20520.0                         |           |                                |                                 |
| 2022/9/6  | 20608                          | 20813.0                         |           |                                |                                 |
| 2022/9/7  | 21148                          | 21095.0                         |           |                                |                                 |
| 2022/9/8  | 21374                          | 21366.0                         |           |                                |                                 |

(c) Spain

| Date      | Observed<br>cumulated<br>cases | Simulated<br>cumulated<br>cases | Date      | Observed<br>cumulated<br>cases | Simulated<br>cumulated<br>cases |
|-----------|--------------------------------|---------------------------------|-----------|--------------------------------|---------------------------------|
| 2022/5/18 | 7                              | 7.0                             | 2022/6/25 | 736                            | 919.4                           |
| 2022/5/19 | 7                              | 8.8                             | 2022/6/26 | 736                            | 975.2                           |
| 2022/5/20 | 30                             | 10.8                            | 2022/6/27 | 800                            | 1032.9                          |
| 2022/5/21 | 40                             | 13.2                            | 2022/6/28 | 800                            | 1092.5                          |
| 2022/5/22 | 40                             | 15.8                            | 2022/6/29 | 800                            | 1154.4                          |
| 2022/5/23 | 41                             | 18.8                            | 2022/6/30 | 1196                           | 1218.6                          |
| 2022/5/24 | 45                             | 22.1                            | 2022/7/1  | 1196                           | 1285.1                          |
| 2022/5/25 | 53                             | 25.9                            | 2022/7/2  | 1196                           | 1354.0                          |
| 2022/5/26 | 78                             | 30.2                            | 2022/7/3  | 1196                           | 1425.2                          |
| 2022/5/27 | 99                             | 35.1                            | 2022/7/4  | 1258                           | 1498.9                          |
| 2022/5/28 | 99                             | 40.7                            | 2022/7/5  | 1258                           | 1575.5                          |
| 2022/5/29 | 108                            | 46.9                            | 2022/7/6  | 1258                           | 1655.0                          |
| 2022/5/30 | 116                            | 54.1                            | 2022/7/7  | 1258                           | 1737.2                          |
| 2022/5/31 | 136                            | 62.1                            | 2022/7/8  | 2034                           | 1822.3                          |
| 2022/6/1  | 136                            | 71.2                            | 2022/7/9  | 2034                           | 1910.1                          |
| 2022/6/2  | 162                            | 81.6                            | 2022/7/10 | 2034                           | 2001.4                          |
| 2022/6/3  | 181                            | 93.2                            | 2022/7/11 | 2034                           | 2096.0                          |
| 2022/6/4  | 181                            | 106.5                           | 2022/7/12 | 2447                           | 2194.2                          |
| 2022/6/5  | 181                            | 121.5                           | 2022/7/13 | 2447                           | 2295.8                          |
| 2022/6/6  | 198                            | 138.5                           | 2022/7/14 | 2447                           | 2400.8                          |
| 2022/6/7  | 225                            | 157.8                           | 2022/7/15 | 2835                           | 2509.5                          |
| 2022/6/8  | 259                            | 179.6                           | 2022/7/16 | 2835                           | 2622.0                          |
| 2022/6/9  | 259                            | 204.3                           | 2022/7/17 | 2835                           | 2711.7                          |
| 2022/6/10 | 275                            | 232.3                           | 2022/7/18 | 2835                           | 2799.8                          |
| 2022/6/11 | 275                            | 264.0                           | 2022/7/19 | 3125                           | 2887.9                          |
| 2022/6/12 | 275                            | 299.8                           | 2022/7/20 | 3125                           | 2975.9                          |
| 2022/6/13 | 275                            | 340.5                           | 2022/7/21 | 3125                           | 3063.9                          |
| 2022/6/14 | 313                            | 386.5                           | 2022/7/22 | 3126                           | 3151.9                          |
| 2022/6/15 | 313                            | 438.7                           | 2022/7/23 | 3126                           | 3239.8                          |
| 2022/6/16 | 497                            | 497.8                           | 2022/7/24 | 3126                           | 3327.7                          |
| 2022/6/17 | 498                            | 538.5                           | 2022/7/25 | 3126                           | 3415.6                          |
| 2022/6/18 | 498                            | 580.4                           | 2022/7/26 | 3738                           | 3503.4                          |
| 2022/6/19 | 498                            | 623.8                           | 2022/7/27 | 3738                           | 3591.1                          |
| 2022/6/20 | 521                            | 668.8                           | 2022/7/28 | 3738                           | 3678.8                          |
| 2022/6/21 | 521                            | 715.5                           | 2022/7/29 | 4299                           | 3766.5                          |
| 2022/6/22 | 521                            | 763.8                           | 2022/7/30 | 4300                           | 3854.1                          |
| 2022/6/23 | 736                            | 813.8                           | 2022/7/31 | 4300                           | 3941.7                          |
| 2022/6/24 | 736                            | 865.6                           | 2022/8/1  | 4300                           | 4029.2                          |

| Date      | Observed<br>cumulated<br>cases | Simulated<br>cumulated<br>cases | Date      | Observed<br>cumulated<br>cases | Simulated<br>cumulated<br>cases |
|-----------|--------------------------------|---------------------------------|-----------|--------------------------------|---------------------------------|
| 2022/8/2  | 4577                           | 4116.7                          | 2022/9/9  | 6884                           | 6890.4                          |
| 2022/8/3  | 4577                           | 4204.1                          | 2022/9/10 | 6884                           | 6910.8                          |
| 2022/8/4  | 4577                           | 4291.5                          | 2022/9/11 | 6884                           | 6929.9                          |
| 2022/8/5  | 4942                           | 4378.9                          | 2022/9/12 | 6884                           | 6947.9                          |
| 2022/8/6  | 4942                           | 4466.2                          | 2022/9/13 | 6947                           | 6964.7                          |
| 2022/8/7  | 4942                           | 4553.4                          | 2022/9/14 | 6947                           | 6980.4                          |
| 2022/8/8  | 4942                           | 4640.6                          | 2022/9/15 | 6947                           | 6995.1                          |
| 2022/8/9  | 5162                           | 4727.8                          | 2022/9/16 | 7037                           | 7009.0                          |
| 2022/8/10 | 5162                           | 4814.8                          | 2022/9/17 | 7037                           | 7021.9                          |
| 2022/8/11 | 5162                           | 4901.8                          | 2022/9/18 | 7037                           | 7033.9                          |
| 2022/8/12 | 5719                           | 4988.8                          | 2022/9/19 | 7037                           | 7045.2                          |
| 2022/8/13 | 5719                           | 5075.7                          | 2022/9/20 | 7083                           | 7055.9                          |
| 2022/8/14 | 5719                           | 5162.6                          | 2022/9/21 | 7083                           | 7065.8                          |
| 2022/8/15 | 5719                           | 5249.4                          | 2022/9/22 | 7083                           | 7075.0                          |
| 2022/8/16 | 5792                           | 5336.1                          | 2022/9/23 | 7083                           | 7083.7                          |
| 2022/8/17 | 5792                           | 5422.8                          | 2022/9/9  | 6884                           | 6890.4                          |
| 2022/8/18 | 5792                           | 5509.4                          | 2022/9/10 | 6884                           | 6910.8                          |
| 2022/8/19 | 6119                           | 5596.0                          | 2022/9/11 | 6884                           | 6929.9                          |
| 2022/8/20 | 6119                           | 5682.5                          | 2022/9/12 | 6884                           | 6947.9                          |
| 2022/8/21 | 6119                           | 5768.9                          | 2022/9/13 | 6947                           | 6964.7                          |
| 2022/8/22 | 6119                           | 5855.3                          | 2022/9/14 | 6947                           | 6980.4                          |
| 2022/8/23 | 6284                           | 5941.6                          | 2022/9/15 | 6947                           | 6995.1                          |
| 2022/8/24 | 6284                           | 6027.8                          | 2022/9/16 | 7037                           | 7009.0                          |
| 2022/8/25 | 6284                           | 6114.0                          | 2022/9/17 | 7037                           | 7021.9                          |
| 2022/8/26 | 6459                           | 6200.0                          | 2022/9/18 | 7037                           | 7033.9                          |
| 2022/8/27 | 6459                           | 6286.1                          | 2022/9/19 | 7037                           | 7045.2                          |
| 2022/8/28 | 6459                           | 6372.0                          | 2022/9/20 | 7083                           | 7055.9                          |
| 2022/8/29 | 6459                           | 6457.9                          | 2022/9/21 | 7083                           | 7065.8                          |
| 2022/8/30 | 6543                           | 6543.8                          | 2022/9/22 | 7083                           | 7075.0                          |
| 2022/8/31 | 6543                           | 6629.5                          | 2022/9/23 | 7083                           | 7083.7                          |
| 2022/9/1  | 6543                           | 6667.7                          |           |                                |                                 |
| 2022/9/2  | 6645                           | 6702.3                          |           |                                |                                 |
| 2022/9/3  | 6645                           | 6734.6                          |           |                                |                                 |
| 2022/9/4  | 6645                           | 6765.0                          |           |                                |                                 |
| 2022/9/5  | 6645                           | 6793.6                          |           |                                |                                 |
| 2022/9/6  | 6749                           | 6820.2                          |           |                                |                                 |
| 2022/9/7  | 6749                           | 6845.1                          |           |                                |                                 |
| 2022/9/8  | 6749                           | 6868.4                          |           |                                |                                 |

(d) **Brazil**

| Date      | Observed<br>cumulated<br>cases | Simulated<br>cumulated<br>cases | Date      | Observed<br>cumulated<br>cases | Simulated<br>cumulated<br>cases |
|-----------|--------------------------------|---------------------------------|-----------|--------------------------------|---------------------------------|
| 2022/6/8  | 1                              | 1                               | 2022/7/16 | 347                            | 407.9                           |
| 2022/6/9  | 1                              | 1.3                             | 2022/7/17 | 347                            | 444.6                           |
| 2022/6/10 | 1                              | 1.6                             | 2022/7/18 | 347                            | 483.8                           |
| 2022/6/11 | 2                              | 2.1                             | 2022/7/19 | 448                            | 526                             |
| 2022/6/12 | 3                              | 2.5                             | 2022/7/20 | 591                            | 571.3                           |
| 2022/6/13 | 3                              | 3.1                             | 2022/7/21 | 604                            | 619.7                           |
| 2022/6/14 | 5                              | 3.8                             | 2022/7/22 | 694                            | 671.9                           |
| 2022/6/15 | 5                              | 4.5                             | 2022/7/23 | 694                            | 727.9                           |
| 2022/6/16 | 6                              | 5.5                             | 2022/7/24 | 694                            | 787.8                           |
| 2022/6/17 | 7                              | 6.5                             | 2022/7/25 | 809                            | 852.2                           |
| 2022/6/18 | 7                              | 7.8                             | 2022/7/26 | 865                            | 921.4                           |
| 2022/6/19 | 8                              | 9.2                             | 2022/7/27 | 977                            | 995.4                           |
| 2022/6/20 | 8                              | 10.9                            | 2022/7/28 | 1066                           | 1075                            |
| 2022/6/21 | 9                              | 13                              | 2022/7/29 | 1259                           | 1160.5                          |
| 2022/6/22 | 11                             | 15.3                            | 2022/7/30 | 1343                           | 1251.8                          |
| 2022/6/23 | 16                             | 18.1                            | 2022/7/31 | 1370                           | 1350.1                          |
| 2022/6/24 | 17                             | 21.3                            | 2022/8/1  | 1475                           | 1455.8                          |
| 2022/6/25 | 19                             | 25.1                            | 2022/8/2  | 1603                           | 1568.6                          |
| 2022/6/26 | 20                             | 29.5                            | 2022/8/3  | 1721                           | 1689.9                          |
| 2022/6/27 | 20                             | 34.7                            | 2022/8/4  | 1860                           | 1820.3                          |
| 2022/6/28 | 21                             | 40.8                            | 2022/8/5  | 2004                           | 1959.9                          |
| 2022/6/29 | 37                             | 48                              | 2022/8/6  | 2108                           | 2109.7                          |
| 2022/6/30 | 49                             | 56.4                            | 2022/8/7  | 2131                           | 2214.2                          |
| 2022/7/1  | 64                             | 66.2                            | 2022/8/8  | 2293                           | 2320.1                          |
| 2022/7/2  | 76                             | 77.7                            | 2022/8/9  | 2415                           | 2426.9                          |
| 2022/7/3  | 78                             | 91.2                            | 2022/8/10 | 2458                           | 2534.8                          |
| 2022/7/4  | 80                             | 107                             | 2022/8/11 | 2458                           | 2643.6                          |
| 2022/7/5  | 106                            | 125.5                           | 2022/8/12 | 2746                           | 2753.5                          |
| 2022/7/6  | 142                            | 147.2                           | 2022/8/13 | 2848                           | 2864.3                          |
| 2022/7/7  | 172                            | 172.7                           | 2022/8/14 | 2893                           | 2976.2                          |
| 2022/7/8  | 204                            | 191.9                           | 2022/8/15 | 2985                           | 3089.1                          |
| 2022/7/9  | 218                            | 212.7                           | 2022/8/16 | 3183                           | 3203                            |
| 2022/7/10 | 218                            | 235                             | 2022/8/17 | 3359                           | 3317.9                          |
| 2022/7/11 | 228                            | 259                             | 2022/8/18 | 3450                           | 3433.8                          |
| 2022/7/12 | 266                            | 284.7                           | 2022/8/19 | 3655                           | 3550.8                          |
| 2022/7/13 | 308                            | 312.3                           | 2022/8/20 | 3755                           | 3668.7                          |
| 2022/7/14 | 347                            | 342                             | 2022/8/21 | 3787                           | 3787.7                          |
| 2022/7/15 | 347                            | 373.7                           | 2022/8/22 | 3896                           | 3907.7                          |

| Date      | Observed<br>cumulated<br>cases | Simulated<br>cumulated<br>cases | Date | Observed<br>cumulated<br>cases | Simulated<br>cumulated<br>cases |
|-----------|--------------------------------|---------------------------------|------|--------------------------------|---------------------------------|
| 2022/8/23 | 3984                           | 4028.9                          |      |                                |                                 |
| 2022/8/24 | 4144                           | 4151.2                          |      |                                |                                 |
| 2022/8/25 | 4216                           | 4274.6                          |      |                                |                                 |
| 2022/8/26 | 4472                           | 4399.1                          |      |                                |                                 |
| 2022/8/27 | 4472                           | 4524.6                          |      |                                |                                 |
| 2022/8/28 | 4472                           | 4651.3                          |      |                                |                                 |
| 2022/8/29 | 4692                           | 4779                            |      |                                |                                 |
| 2022/8/30 | 4876                           | 4907.9                          |      |                                |                                 |
| 2022/8/31 | 5037                           | 5037.8                          |      |                                |                                 |
| 2022/9/1  | 5197                           | 5150.4                          |      |                                |                                 |
| 2022/9/2  | 5197                           | 5259.4                          |      |                                |                                 |
| 2022/9/3  | 5197                           | 5367.4                          |      |                                |                                 |
| 2022/9/4  | 5409                           | 5474.2                          |      |                                |                                 |
| 2022/9/5  | 5525                           | 5579.9                          |      |                                |                                 |
| 2022/9/6  | 5692                           | 5684.4                          |      |                                |                                 |
| 2022/9/7  | 5726                           | 5787.9                          |      |                                |                                 |
| 2022/9/8  | 5852                           | 5890.2                          |      |                                |                                 |
| 2022/9/9  | 5971                           | 5991.4                          |      |                                |                                 |
| 2022/9/10 | 6014                           | 6091.6                          |      |                                |                                 |
| 2022/9/11 | 6032                           | 6190.7                          |      |                                |                                 |
| 2022/9/12 | 6129                           | 6288.7                          |      |                                |                                 |
| 2022/9/13 | 6246                           | 6385.8                          |      |                                |                                 |
| 2022/9/14 | 6448                           | 6481.9                          |      |                                |                                 |
| 2022/9/15 | 6649                           | 6576.9                          |      |                                |                                 |
| 2022/9/16 | 6806                           | 6670.9                          |      |                                |                                 |
| 2022/9/17 | 6867                           | 6763.9                          |      |                                |                                 |
| 2022/9/18 | 6867                           | 6855.9                          |      |                                |                                 |
| 2022/9/19 | 7018                           | 6946.9                          |      |                                |                                 |
| 2022/9/20 | 7115                           | 7036.9                          |      |                                |                                 |
| 2022/9/21 | 7205                           | 7125.8                          |      |                                |                                 |
| 2022/9/22 | 7300                           | 7213.9                          |      |                                |                                 |
| 2022/9/23 | 7300                           | 7301                            |      |                                |                                 |

**(e) United Kingdom**

| Date      | Observed<br>cumulated<br>cases | Simulated<br>cumulated<br>cases | Date      | Observed<br>cumulated<br>cases | Simulated<br>cumulated<br>cases |
|-----------|--------------------------------|---------------------------------|-----------|--------------------------------|---------------------------------|
| 2022/5/6  | 1                              | 1.0                             | 2022/6/13 | 470                            | 445.4                           |
| 2022/5/7  | 1                              | 1.3                             | 2022/6/14 | 524                            | 474.6                           |
| 2022/5/8  | 1                              | 1.7                             | 2022/6/15 | 524                            | 504.8                           |
| 2022/5/9  | 1                              | 2.1                             | 2022/6/16 | 574                            | 536.2                           |
| 2022/5/10 | 1                              | 2.6                             | 2022/6/17 | 574                            | 568.9                           |
| 2022/5/11 | 1                              | 3.2                             | 2022/6/18 | 574                            | 602.7                           |
| 2022/5/12 | 2                              | 4.0                             | 2022/6/19 | 574                            | 637.7                           |
| 2022/5/13 | 3                              | 4.8                             | 2022/6/20 | 793                            | 674.0                           |
| 2022/5/14 | 3                              | 5.8                             | 2022/6/21 | 793                            | 711.7                           |
| 2022/5/15 | 7                              | 7.0                             | 2022/6/22 | 793                            | 750.9                           |
| 2022/5/16 | 7                              | 8.5                             | 2022/6/23 | 910                            | 791.6                           |
| 2022/5/17 | 7                              | 10.2                            | 2022/6/24 | 910                            | 833.6                           |
| 2022/5/18 | 9                              | 12.2                            | 2022/6/25 | 910                            | 877.2                           |
| 2022/5/19 | 9                              | 14.5                            | 2022/6/26 | 1076                           | 922.5                           |
| 2022/5/20 | 20                             | 17.3                            | 2022/6/27 | 1076                           | 969.6                           |
| 2022/5/21 | 20                             | 20.6                            | 2022/6/28 | 1076                           | 1018.4                          |
| 2022/5/22 | 20                             | 24.6                            | 2022/6/29 | 1076                           | 1069.0                          |
| 2022/5/23 | 57                             | 29.2                            | 2022/6/30 | 1235                           | 1121.3                          |
| 2022/5/24 | 71                             | 34.7                            | 2022/7/1  | 1235                           | 1175.6                          |
| 2022/5/25 | 78                             | 41.2                            | 2022/7/2  | 1235                           | 1232.0                          |
| 2022/5/26 | 106                            | 48.9                            | 2022/7/3  | 1235                           | 1290.4                          |
| 2022/5/27 | 106                            | 58.0                            | 2022/7/4  | 1351                           | 1351.4                          |
| 2022/5/28 | 106                            | 68.8                            | 2022/7/5  | 1351                           | 1395.5                          |
| 2022/5/29 | 106                            | 81.6                            | 2022/7/6  | 1351                           | 1440.5                          |
| 2022/5/30 | 179                            | 96.8                            | 2022/7/7  | 1552                           | 1485.2                          |
| 2022/5/31 | 190                            | 114.7                           | 2022/7/8  | 1552                           | 1529.8                          |
| 2022/6/1  | 196                            | 135.9                           | 2022/7/9  | 1552                           | 1574.2                          |
| 2022/6/2  | 207                            | 161.0                           | 2022/7/10 | 1552                           | 1618.3                          |
| 2022/6/3  | 226                            | 190.7                           | 2022/7/11 | 1735                           | 1662.3                          |
| 2022/6/4  | 226                            | 226.0                           | 2022/7/12 | 1735                           | 1706.1                          |
| 2022/6/5  | 226                            | 246.8                           | 2022/7/13 | 1735                           | 1749.7                          |
| 2022/6/6  | 302                            | 268.5                           | 2022/7/14 | 1856                           | 1793.0                          |
| 2022/6/7  | 321                            | 291.1                           | 2022/7/15 | 1856                           | 1836.2                          |
| 2022/6/8  | 321                            | 314.6                           | 2022/7/16 | 1856                           | 1879.3                          |
| 2022/6/9  | 366                            | 338.8                           | 2022/7/17 | 1856                           | 1922.1                          |
| 2022/6/10 | 366                            | 364.0                           | 2022/7/18 | 2137                           | 1964.7                          |
| 2022/6/11 | 366                            | 390.1                           | 2022/7/19 | 2137                           | 2007.1                          |
| 2022/6/12 | 470                            | 417.3                           | 2022/7/20 | 2137                           | 2049.3                          |



| Date      | Observed<br>cumulated<br>cases | Simulated<br>cumulated<br>cases | Date      | Observed<br>cumulated<br>cases | Simulated<br>cumulated<br>cases |
|-----------|--------------------------------|---------------------------------|-----------|--------------------------------|---------------------------------|
| 2022/7/21 | 2208                           | 2091.4                          | 2022/8/28 | 3340                           | 3428.3                          |
| 2022/7/22 | 2208                           | 2133.2                          | 2022/8/29 | 3413                           | 3440.0                          |
| 2022/7/23 | 2208                           | 2174.9                          | 2022/8/30 | 3413                           | 3451.0                          |
| 2022/7/24 | 2208                           | 2216.3                          | 2022/8/31 | 3413                           | 3461.4                          |
| 2022/7/25 | 2497                           | 2257.6                          | 2022/9/1  | 3413                           | 3471.2                          |
| 2022/7/26 | 2497                           | 2298.7                          | 2022/9/2  | 3413                           | 3480.3                          |
| 2022/7/27 | 2497                           | 2339.7                          | 2022/9/3  | 3413                           | 3488.9                          |
| 2022/7/28 | 2546                           | 2380.4                          | 2022/9/4  | 3413                           | 3497.0                          |
| 2022/7/29 | 2546                           | 2420.9                          | 2022/9/5  | 3484                           | 3504.6                          |
| 2022/7/30 | 2546                           | 2461.3                          | 2022/9/6  | 3484                           | 3511.7                          |
| 2022/7/31 | 2546                           | 2501.5                          | 2022/9/7  | 3484                           | 3518.4                          |
| 2022/8/1  | 2759                           | 2541.5                          | 2022/9/8  | 3484                           | 3524.7                          |
| 2022/8/2  | 2759                           | 2581.3                          | 2022/9/9  | 3484                           | 3530.6                          |
| 2022/8/3  | 2759                           | 2620.9                          | 2022/9/10 | 3484                           | 3536.2                          |
| 2022/8/4  | 2859                           | 2660.4                          | 2022/9/11 | 3484                           | 3541.4                          |
| 2022/8/5  | 2859                           | 2699.7                          | 2022/9/12 | 3552                           | 3546.3                          |
| 2022/8/6  | 2859                           | 2738.7                          | 2022/9/13 | 3552                           | 3550.9                          |
| 2022/8/7  | 2859                           | 2777.6                          | 2022/9/14 | 3552                           | 3555.2                          |
| 2022/8/8  | 3017                           | 2816.4                          | 2022/9/15 | 3552                           | 3559.2                          |
| 2022/8/9  | 3017                           | 2854.9                          | 2022/9/16 | 3552                           | 3563.0                          |
| 2022/8/10 | 3017                           | 2893.3                          | 2022/9/17 | 3552                           | 3566.6                          |
| 2022/8/11 | 3017                           | 2931.5                          | 2022/9/18 | 3552                           | 3570.0                          |
| 2022/8/12 | 3017                           | 2969.5                          | 2022/9/19 | 3552                           | 3573.1                          |
| 2022/8/13 | 3017                           | 3007.4                          | 2022/9/20 | 3585                           | 3576.1                          |
| 2022/8/14 | 3017                           | 3045.1                          | 2022/9/21 | 3585                           | 3578.9                          |
| 2022/8/15 | 3195                           | 3082.6                          | 2022/9/22 | 3585                           | 3581.5                          |
| 2022/8/16 | 3195                           | 3119.9                          | 2022/9/23 | 3585                           | 3583.9                          |
| 2022/8/17 | 3195                           | 3157.1                          |           |                                |                                 |
| 2022/8/18 | 3195                           | 3194.1                          |           |                                |                                 |
| 2022/8/19 | 3195                           | 3230.9                          |           |                                |                                 |
| 2022/8/20 | 3195                           | 3267.5                          |           |                                |                                 |
| 2022/8/21 | 3195                           | 3304.0                          |           |                                |                                 |
| 2022/8/22 | 3340                           | 3340.6                          |           |                                |                                 |
| 2022/8/23 | 3340                           | 3357.0                          |           |                                |                                 |
| 2022/8/24 | 3340                           | 3373.1                          |           |                                |                                 |
| 2022/8/25 | 3340                           | 3388.1                          |           |                                |                                 |
| 2022/8/26 | 3340                           | 3402.3                          |           |                                |                                 |
| 2022/8/27 | 3340                           | 3415.7                          |           |                                |                                 |

**(f) Democratic Republic of the Congo**

| Date      | Observed<br>cumulated<br>cases | Simulated<br>cumulated<br>cases | Date      | Observed<br>cumulated<br>cases | Simulated<br>cumulated<br>cases |
|-----------|--------------------------------|---------------------------------|-----------|--------------------------------|---------------------------------|
| 2022/5/8  | 10                             | 10.0                            | 2022/6/15 | 107                            | 133.4                           |
| 2022/5/9  | 10                             | 11.7                            | 2022/6/16 | 107                            | 135.1                           |
| 2022/5/10 | 10                             | 13.5                            | 2022/6/17 | 107                            | 136.7                           |
| 2022/5/11 | 10                             | 15.3                            | 2022/6/18 | 107                            | 138.2                           |
| 2022/5/12 | 10                             | 17.3                            | 2022/6/19 | 107                            | 139.6                           |
| 2022/5/13 | 10                             | 19.4                            | 2022/6/20 | 107                            | 140.9                           |
| 2022/5/14 | 10                             | 21.5                            | 2022/6/21 | 107                            | 142.2                           |
| 2022/5/15 | 10                             | 23.8                            | 2022/6/22 | 107                            | 143.4                           |
| 2022/5/16 | 10                             | 26.1                            | 2022/6/23 | 107                            | 144.6                           |
| 2022/5/17 | 10                             | 28.6                            | 2022/6/24 | 107                            | 145.7                           |
| 2022/5/18 | 10                             | 31.2                            | 2022/6/25 | 107                            | 146.7                           |
| 2022/5/19 | 10                             | 34.0                            | 2022/6/26 | 107                            | 147.7                           |
| 2022/5/20 | 10                             | 36.9                            | 2022/6/27 | 107                            | 148.7                           |
| 2022/5/21 | 10                             | 39.9                            | 2022/6/28 | 107                            | 149.6                           |
| 2022/5/22 | 10                             | 43.0                            | 2022/6/29 | 107                            | 150.4                           |
| 2022/5/23 | 10                             | 46.3                            | 2022/6/30 | 107                            | 151.2                           |
| 2022/5/24 | 10                             | 49.8                            | 2022/7/1  | 107                            | 152.0                           |
| 2022/5/25 | 10                             | 53.5                            | 2022/7/2  | 107                            | 152.7                           |
| 2022/5/26 | 10                             | 57.3                            | 2022/7/3  | 107                            | 153.4                           |
| 2022/5/27 | 10                             | 61.3                            | 2022/7/4  | 107                            | 154.1                           |
| 2022/5/28 | 10                             | 65.6                            | 2022/7/5  | 107                            | 154.7                           |
| 2022/5/29 | 10                             | 70.0                            | 2022/7/6  | 107                            | 155.3                           |
| 2022/5/30 | 10                             | 74.6                            | 2022/7/7  | 107                            | 155.9                           |
| 2022/5/31 | 10                             | 79.5                            | 2022/7/8  | 107                            | 156.4                           |
| 2022/6/1  | 10                             | 84.6                            | 2022/7/9  | 107                            | 156.9                           |
| 2022/6/2  | 10                             | 90.0                            | 2022/7/10 | 107                            | 157.4                           |
| 2022/6/3  | 10                             | 95.6                            | 2022/7/11 | 107                            | 157.9                           |
| 2022/6/4  | 10                             | 101.5                           | 2022/7/12 | 107                            | 158.3                           |
| 2022/6/5  | 107                            | 107.6                           | 2022/7/13 | 107                            | 158.7                           |
| 2022/6/6  | 107                            | 114.2                           | 2022/7/14 | 107                            | 159.1                           |
| 2022/6/7  | 107                            | 116.7                           | 2022/7/15 | 107                            | 159.5                           |
| 2022/6/8  | 107                            | 119.2                           | 2022/7/16 | 107                            | 159.9                           |
| 2022/6/9  | 107                            | 121.5                           | 2022/7/17 | 107                            | 160.2                           |
| 2022/6/10 | 107                            | 123.8                           | 2022/7/18 | 107                            | 160.5                           |
| 2022/6/11 | 107                            | 125.9                           | 2022/7/19 | 107                            | 160.8                           |
| 2022/6/12 | 107                            | 128.0                           | 2022/7/20 | 107                            | 161.1                           |
| 2022/6/13 | 107                            | 129.9                           | 2022/7/21 | 107                            | 161.4                           |
| 2022/6/14 | 107                            | 131.7                           | 2022/7/22 | 107                            | 161.7                           |

| Date      | Observed<br>cumulated<br>cases | Simulated<br>cumulated<br>cases | Date      | Observed<br>cumulated<br>cases | Simulated<br>cumulated<br>cases |
|-----------|--------------------------------|---------------------------------|-----------|--------------------------------|---------------------------------|
| 2022/7/23 | 107                            | 161.9                           | 2022/8/20 | 195                            | -                               |
| 2022/7/24 | 107                            | 162.2                           | 2022/8/21 | 195                            | -                               |
| 2022/7/25 | 107                            | 162.4                           | 2022/8/22 | 195                            | -                               |
| 2022/7/26 | 107                            | 162.6                           | 2022/8/23 | 195                            | -                               |
| 2022/7/27 | 107                            | 162.8                           | 2022/8/24 | 195                            | -                               |
| 2022/7/28 | 163                            | 163.0                           | 2022/8/25 | 195                            | -                               |
| 2022/7/29 | 163                            | 164.0                           | 2022/8/26 | 195                            | -                               |
| 2022/7/30 | 163                            | 165.3                           | 2022/8/27 | 195                            | -                               |
| 2022/7/31 | 163                            | 166.9                           | 2022/8/28 | 195                            | -                               |
| 2022/8/1  | 163                            | 168.9                           | 2022/8/29 | 195                            | -                               |
| 2022/8/2  | 163                            | 171.3                           | 2022/8/30 | 195                            | -                               |
| 2022/8/3  | 163                            | 174.3                           | 2022/8/31 | 195                            | -                               |
| 2022/8/4  | 163                            | 178.0                           | 2022/9/1  | 195                            | -                               |
| 2022/8/5  | 163                            | 182.6                           | 2022/9/2  | 195                            | -                               |
| 2022/8/6  | 163                            | 188.2                           | 2022/9/3  | 195                            | -                               |
| 2022/8/7  | 195                            | 195.2                           | 2022/9/4  | 195                            | -                               |
| 2022/8/8  | 195                            | -                               | 2022/9/5  | 195                            | -                               |
| 2022/8/9  | 195                            | -                               | 2022/9/6  | 195                            | -                               |
| 2022/8/10 | 195                            | -                               | 2022/9/7  | 195                            | -                               |
| 2022/8/11 | 195                            | -                               | 2022/9/8  | 195                            | -                               |
| 2022/8/12 | 195                            | -                               | 2022/9/9  | 195                            | -                               |
| 2022/8/13 | 195                            | -                               | 2022/9/10 | 195                            | -                               |
| 2022/8/14 | 195                            | -                               | 2022/9/11 | 195                            | -                               |
| 2022/8/15 | 195                            | -                               | 2022/9/12 | 195                            | -                               |
| 2022/8/16 | 195                            | -                               | 2022/9/13 | 195                            | -                               |
| 2022/8/17 | 195                            | -                               | 2022/9/14 | 195                            | -                               |
| 2022/8/18 | 195                            | -                               | 2022/9/15 | 195                            | -                               |
| 2022/8/19 | 195                            | -                               | 2022/9/16 | 195                            | -                               |
